# Supplementary material for: Emergence of a Reassortant 2.3.4.4b Highly Pathogenic H5N1 Avian Influenza Virus Containing H9N2 PA Gene in Burkina Faso, West Africa, in 2021
Source: MDPI journal article supplement (doi:10.3390/v14091901), 2022-08-27
Supplement: s1 [file s1]

**Table S1.** GISAID's EpiFlu™ Database acknowledgment table.

| We gratefully acknowledge the authors, originating and submitting laboratories of the sequences from GISAID's EpiFlu™ Database on which this research is based in part. The list is detailed below. |         |                |                 |                                 |                                                         |                                         |                                                     |                                                                                                                                          |
|-----------------------------------------------------------------------------------------------------------------------------------------------------------------------------------------------------|---------|----------------|-----------------|---------------------------------|---------------------------------------------------------|-----------------------------------------|-----------------------------------------------------|------------------------------------------------------------------------------------------------------------------------------------------|
| <a href="http://www.gisaid.org">All submitters of data may be contacted directly via www.gisaid.org</a>                                                                                             |         |                |                 |                                 |                                                         |                                         |                                                     |                                                                                                                                          |
| Segment ID                                                                                                                                                                                          | Segment | Country        | Collection date | Isolate-ID                      | Isolate_name                                            | Originating Lab                         | Submitting Lab                                      | Authors                                                                                                                                  |
| <a href="#">EPI1942914</a>                                                                                                                                                                          | HA      | Belgium        | 2020-Dec-26     | <a href="#">EPI_ISL_7622862</a> | A/Anser_brachyrhynchus/Belgium/151/2020                 | Sciensano - Animal Infectious Diseases  | Sciensano, Department of Animal Infectious Diseases | Van Borm, Steven; Vandenbussche, Frank; Roupie, Virginie; Lambrecht, Benedicte; Steensels, Mieke                                         |
| <a href="#">EPI1848934</a>                                                                                                                                                                          | HA      | United Kingdom | 2021-Feb-10     | <a href="#">EPI_ISL_1123361</a> | A/pheasant/Scotland/000348/2021                         | Animal and Plant Health Agency (APHA)   | Animal and Plant Health Agency (APHA)               |                                                                                                                                          |
| <a href="#">EPI1849453</a>                                                                                                                                                                          | HA      | Netherlands    | 2020-Nov-10     | <a href="#">EPI_ISL_1139102</a> | A/swan/Netherlands/20017772-002/2020                    | Wageningen Bioveterinary Research       | Wageningen Bioveterinary Research                   | Beerens, Nancy; Harders, Frank; Pritz-Verschuren, Sylvia; Roose, Marit; Germeraad, Evelien; Engelsma, Marc; Bossers, Alex; Heutink, Rene |
| <a href="#">EPI1924123</a>                                                                                                                                                                          | HA      | United Kingdom | 2021-Oct-24     | <a href="#">EPI_ISL_5804708</a> | A/mute_swan/England/053054/2021                         | Animal and Plant Health Agency (APHA)   | Animal and Plant Health Agency (APHA)               |                                                                                                                                          |
| <a href="#">EPI1938828</a>                                                                                                                                                                          | HA      | Sweden         | 2021-Nov-08     | <a href="#">EPI_ISL_7050532</a> | A/western_jackdaw/Sweden/SVA2111115 Z0376/FB004483/2021 | National Veterinary Institute, SVA      | National Veterinary Institute                       |                                                                                                                                          |
| <a href="#">EPI1807259</a>                                                                                                                                                                          | HA      | Netherlands    | 2020-Oct-16     | <a href="#">EPI_ISL_603135</a>  | A/Eurasian_Wigeon/Netherlands/5/2020                    | Erasmus Medical Center                  | Erasmus Medical Center                              |                                                                                                                                          |
| <a href="#">EPI1933031</a>                                                                                                                                                                          | HA      | Egypt          | 2020-Dec-23     | <a href="#">EPI_ISL_6816054</a> | A/chicken/Egypt/CAI11/2020                              |                                         | Import from public-domain                           | Khalil,H.S.; Abd El-Hamid,H.S.; Ellakany,H.F.; Elbestawy,A.R.; Mohamed,A.S.A.                                                            |
| <a href="#">EPI1933029</a>                                                                                                                                                                          | HA      | Egypt          | 2020-Oct-08     | <a href="#">EPI_ISL_6816052</a> | A/chicken/Egypt/MEN6/2020                               |                                         | Import from public-domain                           | Khalil,H.S.; Abd El-Hamid,H.S.; Ellakany,H.F.; Elbestawy,A.R.; Mohamed,A.S.A.                                                            |
| <a href="#">EPI1933028</a>                                                                                                                                                                          | HA      | Egypt          | 2020-Feb-14     | <a href="#">EPI_ISL_6816051</a> | A/chicken/Egypt/GIZ4/2020                               |                                         | Import from public-domain                           | Khalil,H.S.; Abd El-Hamid,H.S.; Ellakany,H.F.; Elbestawy,A.R.; Mohamed,A.S.A.                                                            |
| <a href="#">EPI1904329</a>                                                                                                                                                                          | HA      | Egypt          | 2020-Sep-01     | <a href="#">EPI_ISL_4072778</a> | A/chicken/Egypt/v1526/2020                              |                                         | Import from public-domain                           | El-Hoseny,M.M.; Hagag,N.M.; Adel,A.; EL-Zanaty,A.; Seleem,K.; Arafa,A.; Shahien,M.                                                       |
| <a href="#">EPI1848838</a>                                                                                                                                                                          | HA      | United Kingdom | 2020-Dec-16     | <a href="#">EPI_ISL_1123263</a> | A/chicken/Scotland/043405/2020                          | Animal and Plant Health Agency (APHA)   | Animal and Plant Health Agency (APHA)               |                                                                                                                                          |
| <a href="#">EPI1846305</a>                                                                                                                                                                          | HA      | United Kingdom | 2021-Jan-05     | <a href="#">EPI_ISL_996003</a>  | A/chicken/Northern_Ireland/2021-000067_21VIR114-19/2021 | AFBI - Agri-Food & Bioscience Institute | Istituto Zooprofilattico Sperimentale Delle Venezie | McMenamy, MJ.; Harkin, V.; Lemon, K.; Zecchin, B.; Fusaro, A.; Schivo, A.; Salviato, A.; Pastori, A.; Monne, I.; Terregino, C.           |

|                            |    |                |             |                                 |                                                           |                                                                                                                         |                                                     |                                                                                                                                                                                      |
|----------------------------|----|----------------|-------------|---------------------------------|-----------------------------------------------------------|-------------------------------------------------------------------------------------------------------------------------|-----------------------------------------------------|--------------------------------------------------------------------------------------------------------------------------------------------------------------------------------------|
| <a href="#">EPI1933027</a> | HA | Egypt          | 2020-Jan-15 | <a href="#">EPI ISL 6816050</a> | A/Duck/Egypt/BEH2/2020                                    |                                                                                                                         | Import from public-domain                           | Khalil,H.S.; Abd El-Hamid,H.S.; Ellakany,H.F.; Elbestawy,A.R.; Mohamed,A.S.A.                                                                                                        |
| <a href="#">EPI1850269</a> | HA | Netherlands    | 2021-Feb-01 | <a href="#">EPI ISL 1224989</a> | A/common_buzzard/Netherlands/21022834-002/2021            | Wageningen Bioveterinary Research                                                                                       | Wageningen Bioveterinary Research                   | Beerens, Nancy; Harders, Frank; Pritz-Verschuren, Sylvia; Roose, Marit; Germeraad, Evelien; Engelsma, Marc; Bossers, Alex; Heutink, Rene                                             |
| <a href="#">EPI1945522</a> | HA | Finland        | 2021-May-01 | <a href="#">EPI ISL 7778773</a> | A/barnacle_goose/Finland/6247_21VIR7689-6/2021            | Finnish Food Authority                                                                                                  | Istituto Zooprofilattico Sperimentale Delle Venezie | Tammiranta, N.; Kantala, T.; Laamanen, I.; Gadd, T.; Zecchin, B.; Fusaro, A.; Schivo, A.; Salviato, A.; Palumbo, E.; Milani, A.; Giussani, E.; Pastori, A.; Monne, I.; Terregino, C. |
| <a href="#">EPI1945485</a> | HA | Finland        | 2021-Aug-01 | <a href="#">EPI ISL 7778768</a> | A/Eurasian_eagle-owl/Finland/10617_21VIR7689-15/2021      | Finnish Food Authority                                                                                                  | Istituto Zooprofilattico Sperimentale Delle Venezie | Tammiranta, N.; Kantala, T.; Laamanen, I.; Gadd, T.; Zecchin, B.; Fusaro, A.; Schivo, A.; Salviato, A.; Palumbo, E.; Milani, A.; Giussani, E.; Pastori, A.; Monne, I.; Terregino, C. |
| <a href="#">EPI1945469</a> | HA | Finland        | 2021-Aug-01 | <a href="#">EPI ISL 7778766</a> | A/European_herring_gull/Finland/9722_21VIR7689-13/2021    | Finnish Food Authority                                                                                                  | Istituto Zooprofilattico Sperimentale Delle Venezie | Tammiranta, N.; Kantala, T.; Laamanen, I.; Gadd, T.; Zecchin, B.; Fusaro, A.; Schivo, A.; Salviato, A.; Palumbo, E.; Milani, A.; Giussani, E.; Pastori, A.; Monne, I.; Terregino, C. |
| <a href="#">EPI1945381</a> | HA | Estonia        | 2021-May-16 | <a href="#">EPI ISL 7778755</a> | A/white-tailed_eagle/Estonia/TA2111864-2_21VIR7512-6/2021 | Estonian Veterinary and Food Laboratory                                                                                 | Istituto Zooprofilattico Sperimentale Delle Venezie | Nurmoja, I.; Vilem, A.; Juurik, T.; Zecchin, B.; Fusaro, A.; Schivo, A.; Salviato, A.; Palumbo, E.; Milani, A.; Giussani, E.; Pastori, A.; Monne, I.; Terregino, C.                  |
| <a href="#">EPI1883621</a> | HA | Romania        | 2021-Apr-08 | <a href="#">EPI ISL 3102081</a> | A/mute_swan/Romania/11981-1_21VIR3163-5/2021              | Istituto Zooprofilattico Sperimentale delle Venezie, EU/OIE/Reference Laboratory and FAO Reference Centre for AI and ND | Istituto Zooprofilattico Sperimentale Delle Venezie | Onita, I.; Neicut, A.; Raluca, B.; Razvan, M.; Florica, B.; Zecchin, B.; Fusaro, A.; Giussani, E.; Schivo, A.; Salviato, A.; Monne, I.; Terregino, C.                                |
| <a href="#">EPI1812367</a> | HA | Netherlands    | 2020-Oct-28 | <a href="#">EPI ISL 632314</a>  | A/greylag_goose/Netherlands/20016582-004/2020             | Wageningen Bioveterinary Research                                                                                       | Wageningen Bioveterinary Research                   | Beerens, Nancy; Harders, Frank; Verschuren-Pritz, Sylvia; Roose, Marit; Germeraad, Evelien; Engelsma, Marc; Bossers, Alex; Heutink, Rene                                             |
| <a href="#">EPI1848910</a> | HA | United Kingdom | 2020-Nov-12 | <a href="#">EPI ISL 1123358</a> | A/brent_goose/England/095684/2020                         | Animal and Plant Health Agency (APHA)                                                                                   | Animal and Plant Health Agency (APHA)               |                                                                                                                                                                                      |

|                            |    |                    |             |                                 |                                                |                                                              |                                                              |                                                                                                                                          |
|----------------------------|----|--------------------|-------------|---------------------------------|------------------------------------------------|--------------------------------------------------------------|--------------------------------------------------------------|------------------------------------------------------------------------------------------------------------------------------------------|
| <a href="#">EPI1848902</a> | HA | United Kingdom     | 2020-Nov-08 | <a href="#">EPI ISL 1123357</a> | A/brent_goose/England/233339/2020              | Animal and Plant Health Agency (APHA)                        | Animal and Plant Health Agency (APHA)                        |                                                                                                                                          |
| <a href="#">EPI1850253</a> | HA | Netherlands        | 2021-Jan-31 | <a href="#">EPI ISL 1224946</a> | A/barnacle_goose/Netherlands/21022611-001/2021 | Wageningen Bioveterinary Research                            | Wageningen Bioveterinary Research                            | Beerens, Nancy; Harders, Frank; Pritz-Verschuren, Sylvia; Roose, Marit; Germeraad, Evelien; Engelsma, Marc; Bossers, Alex; Heutink, Rene |
| <a href="#">EPI1811572</a> | HA | Germany            | 2020-Oct-28 | <a href="#">EPI ISL 614400</a>  | A/barnacle_goose/Germany-SH/AI02167/2020       | Landeslabor Schleswig-Holstein                               | Friedrich-Loeffler-Institut                                  |                                                                                                                                          |
| <a href="#">EPI1848662</a> | HA | Russian Federation | 2020-Oct-17 | <a href="#">EPI ISL 1114745</a> | A/chicken/Kostroma/304-10/2020                 | State Research Center of Virology and Biotechnology (VECTOR) | State Research Center of Virology and Biotechnology (VECTOR) | Natalia,Goncharova; Ivan,Susloparov; Natalia,Kolosova; Alexey,Danilenko; Juliya,Bulanovich; Vasiliy,Marchenko; Alexander,Ryzhikov        |
| <a href="#">EPI1848654</a> | HA | Russian Federation | 2020-Oct-17 | <a href="#">EPI ISL 1114742</a> | A/chicken/Kostroma/304-08/2020                 | State Research Center of Virology and Biotechnology (VECTOR) | State Research Center of Virology and Biotechnology (VECTOR) | Natalia,Goncharova; Ivan,Susloparov; Natalia,Kolosova; Alexey,Danilenko; Juliya,Bulanovich; Vasiliy,Marchenko; Alexander,Ryzhikov        |
| <a href="#">EPI1848646</a> | HA | Russian Federation | 2020-Oct-17 | <a href="#">EPI ISL 1114741</a> | A/chicken/Kostroma/304-06/2020                 | State Research Center of Virology and Biotechnology (VECTOR) | State Research Center of Virology and Biotechnology (VECTOR) | Natalia,Goncharova; Ivan,Susloparov; Natalia,Kolosova; Alexey,Danilenko; Juliya,Bulanovich; Vasiliy,Marchenko; Alexander,Ryzhikov        |
| <a href="#">EPI1848614</a> | HA | Russian Federation | 2020-Sep-26 | <a href="#">EPI ISL 1114736</a> | A/chicken/Tyumen/302-02/2020                   | State Research Center of Virology and Biotechnology (VECTOR) | State Research Center of Virology and Biotechnology (VECTOR) | Natalia,Goncharova; Ivan,Susloparov; Natalia,Kolosova; Alexey,Danilenko; Juliya,Bulanovich; Vasiliy,Marchenko; Alexander,Ryzhikov        |

|                            |    |                    |             |                                 |                                                      |                                                                                          |                                                              |                                                                                                                                          |
|----------------------------|----|--------------------|-------------|---------------------------------|------------------------------------------------------|------------------------------------------------------------------------------------------|--------------------------------------------------------------|------------------------------------------------------------------------------------------------------------------------------------------|
| <a href="#">EPI1848606</a> | HA | Russian Federation | 2020-Sep-26 | <a href="#">EPI ISL 1114735</a> | A/chicken/Tyumen/302-01/2020                         | State Research Center of Virology and Biotechnology (VECTOR)                             | State Research Center of Virology and Biotechnology (VECTOR) | Natalia,Goncharova; Ivan,Susloparov; Natalia,Kolosova; Alexey,Danilenko; Juliya,Bulanovich; Vasiliy,Marchenko; Alexander,Ryzhikov        |
| <a href="#">EPI1813145</a> | HA | Russian Federation | 2020-Aug-17 | <a href="#">EPI ISL 644125</a>  | A/goose/Omsk/0111/2020                               | State Research Center of Virology and Biotechnology (VECTOR)                             | State Research Center of Virology and Biotechnology (VECTOR) | Natalia,Goncharova; Ivan,Susloparov; Natalia,Kolosova; Alexey,Danilenko; Juliya,Bulanovich; Vasiliy,Marchenko; Alexander,Ryzhikov        |
| <a href="#">EPI1813297</a> | HA | Russian Federation | 2020-Aug-17 | <a href="#">EPI ISL 644144</a>  | A/duck/Omsk/0077/2020                                | State Research Center of Virology and Biotechnology (VECTOR)                             | State Research Center of Virology and Biotechnology (VECTOR) | Natalia,Goncharova; Ivan,Susloparov; Natalia,Kolosova; Alexey,Danilenko; Juliya,Bulanovich; Vasiliy,Marchenko; Alexander,Ryzhikov        |
| <a href="#">EPI1813281</a> | HA | Russian Federation | 2020-Aug-17 | <a href="#">EPI ISL 644142</a>  | A/duck/Omsk/0075/2020                                | State Research Center of Virology and Biotechnology (VECTOR)                             | State Research Center of Virology and Biotechnology (VECTOR) | Natalia,Goncharova; Ivan,Susloparov; Natalia,Kolosova; Alexey,Danilenko; Juliya,Bulanovich; Vasiliy,Marchenko; Alexander,Ryzhikov        |
| <a href="#">EPI1812375</a> | HA | Netherlands        | 2020-Nov-02 | <a href="#">EPI ISL 632315</a>  | A/eurasian_teal/Netherlands/20016896-013/2020        | Wageningen Bioveterinary Research                                                        | Wageningen Bioveterinary Research                            | Beerens, Nancy; Harders, Frank; Verschuren-Pritz, Sylvia; Roose, Marit; Germeraad, Evelien; Engelsma, Marc; Bossers, Alex; Heutink, Rene |
| <a href="#">EPI1813129</a> | HA | Russian Federation | 2020-Aug-13 | <a href="#">EPI ISL 644123</a>  | A/turkey/Omsk/0003/2020                              | State Research Center of Virology and Biotechnology (VECTOR)                             | State Research Center of Virology and Biotechnology (VECTOR) | Natalia,Goncharova; Ivan,Susloparov; Natalia,Kolosova; Alexey,Danilenko; Juliya,Bulanovich; Vasiliy,Marchenko; Alexander,Ryzhikov        |
| <a href="#">EPI1843642</a> | HA | Italy              | 2020-Nov-23 | <a href="#">EPI ISL 956412</a>  | A/greater_white-fronted_goose/Italy/20VIR8073-4/2020 | Istituto Zooprofilattico Sperimentale delle Venezie, EU/OIE/Reference Laboratory and FAO | Istituto Zooprofilattico Sperimentale Delle Venezie          | Zecchin, B.; Fusaro, A.; Milani, A.; Schivo, A.; Salviato, A.; Pastori, A.; Zamperin, G.; Monne, I.; Terregino, C.                       |

|                            |    |                |             |                                  |                                               |                                                                                                                         |                                                         |                                                                                                                                                                                                    |
|----------------------------|----|----------------|-------------|----------------------------------|-----------------------------------------------|-------------------------------------------------------------------------------------------------------------------------|---------------------------------------------------------|----------------------------------------------------------------------------------------------------------------------------------------------------------------------------------------------------|
|                            |    |                |             |                                  |                                               | Reference Centre for AI and ND                                                                                          |                                                         |                                                                                                                                                                                                    |
| <a href="#">EPI1858284</a> | HA | Slovakia       | 2021-Jan-29 | <a href="#">EPI ISL 1665261</a>  | A/mute_swan/Slovakia/Pah15_21VIR1086-3/2021   | Istituto Zooprofilattico Sperimentale delle Venezie, EU/OIE/Reference Laboratory and FAO Reference Centre for AI and ND | Istituto Zooprofilattico Sperimentale Delle Venezie     | Dirb?kov?, Z.; Tin?k, M.; Zecchin, B.; Fusaro, A.; Pastori, A.; Schivo, A.; Salviato, A.; Monne, I.; Terregino, C.                                                                                 |
| <a href="#">EPI1858260</a> | HA | Austria        | 2021-Feb-10 | <a href="#">EPI ISL 1665258</a>  | A/mute_swan/Austria/21013162_21VIR1085-5/2021 | Istituto Zooprofilattico Sperimentale delle Venezie, EU/OIE/Reference Laboratory and FAO Reference Centre for AI and ND | Istituto Zooprofilattico Sperimentale Delle Venezie     | Wodak, E.; Revilla Fern?ndez, S.; Schmoll, F.; Zecchin, B.; Fusaro, A.; Pastori, A.; Schivo, A.; Salviato, A.; Monne, I.; Terregino, C.                                                            |
| <a href="#">EPI1930936</a> | HA | Egypt          | 2021-Nov-01 | <a href="#">EPI ISL 6781491</a>  | A/Turkey/Egypt/A2/2021                        |                                                                                                                         | Import from public-domain                               | Hagag,N.; ElHusseiny,M.; Selim,A.; Zanaty,A.; Arafa,A.                                                                                                                                             |
| <a href="#">EPI1837949</a> | HA | United Kingdom | 2020-Dec-02 | <a href="#">EPI ISL 710505</a>   | A/turkey/England/038115/2020                  | Animal and Plant Health Agency (APHA)                                                                                   | Animal and Plant Health Agency (APHA)                   |                                                                                                                                                                                                    |
| <a href="#">EPI1995204</a> | HA | Niger          | 2022-Jan-01 | <a href="#">EPI ISL 11007545</a> | A/quail/Niger/22VIR1409-30/2022               | Beijing Genomics Institute (BGI)                                                                                        | Istituto Zooprofilattico Sperimentale delle Venezie     | Souley, M.M.; Yaou, B.; Amadou, H.; Haido, A.M.; Issiako, A.; Alassane, A.; Barbierato, G.; Zecchin, B.; Fusaro, A.; Schivo, A.; Salviato, A.; Palumbo, E.; Giussani, E.; Monne, I.; Terregino, C. |
| <a href="#">EPI1995196</a> | HA | Niger          | 2022-Jan-01 | <a href="#">EPI ISL 11007544</a> | A/quail/Niger/22VIR1409-28/2022               | Beijing Genomics Institute (BGI)                                                                                        | Istituto Zooprofilattico Sperimentale delle Venezie     | Souley, M.M.; Yaou, B.; Amadou, H.; Haido, A.M.; Issiako, A.; Alassane, A.; Barbierato, G.; Zecchin, B.; Fusaro, A.; Schivo, A.; Salviato, A.; Palumbo, E.; Giussani, E.; Monne, I.; Terregino, C. |
| <a href="#">EPI1859803</a> | HA | Netherlands    | 2021-Mar-17 | <a href="#">EPI ISL 2174084</a>  | A/common_murre/Netherlands/21025491-002/2021  | Wageningen Bioveterinary Research                                                                                       | Wageningen Bioveterinary Research                       | Beerens, Nancy; Harders, Frank; Pritz-Verschuren, Sylvia; Roose, Marit; Germeraad, Evelien; Engelsma, Marc; Bossers, Alex; Heutink, Rene                                                           |
| <a href="#">EPI1877873</a> | HA | Poland         | 2021-Apr-20 | <a href="#">EPI ISL 2681045</a>  | A/white_stork/Poland/MB391/2021               | National Veterinary Research Institut Poland, PIWet-PIB                                                                 | National Veterinary Research Institut Poland, PIWet-PIB | Edyta, Swieton; Kamila, Dziadek; Krzysztof, Smietanka                                                                                                                                              |

|                            |    |         |             |                                  |                                              |                                  |                                                     |                                                                                                                                                                                                    |
|----------------------------|----|---------|-------------|----------------------------------|----------------------------------------------|----------------------------------|-----------------------------------------------------|----------------------------------------------------------------------------------------------------------------------------------------------------------------------------------------------------|
| <a href="#">EPI1995220</a> | HA | Niger   | 2022-Jan-01 | <a href="#">EPI ISL 11007547</a> | A/chicken/Niger/22VIR1409-9/2022             | Beijing Genomics Institute (BGI) | Istituto Zooprofilattico Sperimentale delle Venezie | Souley, M.M.; Yaou, B.; Amadou, H.; Haido, A.M.; Issiako, A.; Alassane, A.; Barbierato, G.; Zecchin, B.; Fusaro, A.; Schivo, A.; Salviato, A.; Palumbo, E.; Giussani, E.; Monne, I.; Terregino, C. |
| <a href="#">EPI1995212</a> | HA | Niger   | 2022-Jan-01 | <a href="#">EPI ISL 11007546</a> | A/chicken/Niger/22VIR1409-5/2022             | Beijing Genomics Institute (BGI) | Istituto Zooprofilattico Sperimentale delle Venezie | Souley, M.M.; Yaou, B.; Amadou, H.; Haido, A.M.; Issiako, A.; Alassane, A.; Barbierato, G.; Zecchin, B.; Fusaro, A.; Schivo, A.; Salviato, A.; Palumbo, E.; Giussani, E.; Monne, I.; Terregino, C. |
| <a href="#">EPI1995188</a> | HA | Niger   | 2022-Jan-01 | <a href="#">EPI ISL 11007543</a> | A/chicken/Niger/22VIR1409-23/2022            | Beijing Genomics Institute (BGI) | Istituto Zooprofilattico Sperimentale delle Venezie | Souley, M.M.; Yaou, B.; Amadou, H.; Haido, A.M.; Issiako, A.; Alassane, A.; Barbierato, G.; Zecchin, B.; Fusaro, A.; Schivo, A.; Salviato, A.; Palumbo, E.; Giussani, E.; Monne, I.; Terregino, C. |
| <a href="#">EPI1995180</a> | HA | Niger   | 2022-Jan-01 | <a href="#">EPI ISL 11007542</a> | A/chicken/Niger/22VIR1409-13/2022            | Beijing Genomics Institute (BGI) | Istituto Zooprofilattico Sperimentale delle Venezie | Souley, M.M.; Yaou, B.; Amadou, H.; Haido, A.M.; Issiako, A.; Alassane, A.; Barbierato, G.; Zecchin, B.; Fusaro, A.; Schivo, A.; Salviato, A.; Palumbo, E.; Giussani, E.; Monne, I.; Terregino, C. |
| <a href="#">EPI1896085</a> | HA | Nigeria | 2021-Feb-12 | <a href="#">EPI ISL 4061491</a>  | A/chicken/Nigeria/VRD21-98_21VIR2288-6/2021  |                                  | Import from public-domain                           | Shittu,I.; Meseko,C.; Nwosuh,C.; Muhammad,M.; Alabi,O.; Tassoni,L.; Schivo,A.; Salviato,A.; Edoardo,G.; Zecchin,B.; Fusaro,A.; Monne,I.                                                            |
| <a href="#">EPI1898064</a> | HA | Nigeria | 2021-Feb-25 | <a href="#">EPI ISL 4061490</a>  | A/chicken/Nigeria/VRD21-88_21VIR2288-8/2021  |                                  | Import from public-domain                           | Shittu,I.; Meseko,C.; Nwosuh,C.; Muhammad,M.; Alabi,O.; Tassoni,L.; Schivo,A.; Salviato,A.; Edoardo,G.; Zecchin,B.; Fusaro,A.; Monne,I.                                                            |
| <a href="#">EPI1896077</a> | HA | Nigeria | 2021-Feb-11 | <a href="#">EPI ISL 4061488</a>  | A/chicken/Nigeria/VRD21-53B_21VIR2288-5/2021 |                                  | Import from public-domain                           | Shittu,I.; Meseko,C.; Nwosuh,C.; Muhammad,M.; Alabi,O.; Tassoni,L.; Schivo,A.; Salviato,A.; Edoardo,G.; Zecchin,B.; Fusaro,A.; Monne,I.                                                            |

|                            |    |         |             |                                 |                                                |                                                                                                                         |                                                     |                                                                                                                                                                                            |
|----------------------------|----|---------|-------------|---------------------------------|------------------------------------------------|-------------------------------------------------------------------------------------------------------------------------|-----------------------------------------------------|--------------------------------------------------------------------------------------------------------------------------------------------------------------------------------------------|
| <a href="#">EPI1896075</a> | HA | Nigeria | 2021-Feb-05 | <a href="#">EPI ISL 4061486</a> | A/chicken/Nigeria/VRD21-37_21VIR2288-2/2021    |                                                                                                                         | Import from public-domain                           | Shittu,I.; Meseko,C.; Nwosuh,C.; Muhammad,M.; Alabi,O.; Tassoni,L.; Schivo,A.; Salviato,A.; Edoardo,G.; Zecchin,B.; Fusaro,A.; Monne,I.                                                    |
| <a href="#">EPI1896066</a> | HA | Nigeria | 2021-Mar-01 | <a href="#">EPI ISL 4061485</a> | A/chicken/Nigeria/VRD21-109_21VIR2370-425/2021 |                                                                                                                         | Import from public-domain                           | Shittu,I.; Meseko,C.; Nwosuh,C.; Muhammad,M.; Alabi,O.; Tassoni,L.; Schivo,A.; Salviato,A.; Edoardo,G.; Zecchin,B.; Fusaro,A.; Monne,I.                                                    |
| <a href="#">EPI1896058</a> | HA | Nigeria | 2021-Mar-01 | <a href="#">EPI ISL 4061484</a> | A/chicken/Nigeria/VRD21-102_21VIR2370-424/2021 |                                                                                                                         | Import from public-domain                           | Shittu,I.; Meseko,C.; Nwosuh,C.; Muhammad,M.; Alabi,O.; Tassoni,L.; Schivo,A.; Salviato,A.; Edoardo,G.; Zecchin,B.; Fusaro,A.; Monne,I.                                                    |
| <a href="#">EPI1896050</a> | HA | Nigeria | 2021-Mar-01 | <a href="#">EPI ISL 4061483</a> | A/chicken/Nigeria/VRD21-100_21VIR2370-423/2021 |                                                                                                                         | Import from public-domain                           | Shittu,I.; Meseko,C.; Nwosuh,C.; Muhammad,M.; Alabi,O.; Tassoni,L.; Schivo,A.; Salviato,A.; Edoardo,G.; Zecchin,B.; Fusaro,A.; Monne,I.                                                    |
| <a href="#">EPI1896042</a> | HA | Nigeria | 2021-Feb-05 | <a href="#">EPI ISL 4061482</a> | A/chicken/Nigeria/VRD21-035B_21VIR2288-1/2021  |                                                                                                                         | Import from public-domain                           | Shittu,I.; Meseko,C.; Nwosuh,C.; Muhammad,M.; Alabi,O.; Tassoni,L.; Schivo,A.; Salviato,A.; Edoardo,G.; Zecchin,B.; Fusaro,A.; Monne,I.                                                    |
| <a href="#">EPI1896034</a> | HA | Nigeria | 2021-Feb-10 | <a href="#">EPI ISL 4061481</a> | A/chicken/Nigeria/VRD21-43_21VIR2288-4/2021    |                                                                                                                         | Import from public-domain                           | Shittu,I.; Meseko,C.; Nwosuh,C.; Muhammad,M.; Alabi,O.; Tassoni,L.; Schivo,A.; Salviato,A.; Edoardo,G.; Zecchin,B.; Fusaro,A.; Monne,I.                                                    |
| <a href="#">EPI1866465</a> | HA | Senegal | 2020-Dec-23 | <a href="#">EPI ISL 2276070</a> | A/chicken/Senegal/21VIR1084-5/2021             | Istituto Zooprofilattico Sperimentale delle Venezie, EU/OIE/Reference Laboratory and FAO Reference Centre for AI and ND | Istituto Zooprofilattico Sperimentale Delle Venezie | Lo, F.T.; Diallo, A.A.; Ba, R.O.; Diouf, M.; Diop, A.; Samb, Y.N.; Diouf, M.; Diop, M.; Lo, M.M.; Diouf, M.N.; Zecchin, B.; Tassoni, L.; Fusaro, A.; Pastori, A.; Monne, I.; Terregino, C. |
| <a href="#">EPI1866457</a> | HA | Senegal | 2020-Dec-23 | <a href="#">EPI ISL 2276069</a> | A/chicken/Senegal/21VIR1084-4/2021             | Istituto Zooprofilattico Sperimentale delle Venezie, EU/OIE/Reference Laboratory and FAO Reference Centre for AI and ND | Istituto Zooprofilattico Sperimentale Delle Venezie | Lo, F.T.; Diallo, A.A.; Ba, R.O.; Diouf, M.; Diop, A.; Samb, Y.N.; Diouf, M.; Diop, M.; Lo, M.M.; Diouf, M.N.; Zecchin, B.; Tassoni, L.; Fusaro, A.; Pastori, A.; Monne, I.; Terregino, C. |

|                            |    |                |             |                                 |                                                      |                                                                                                                         |                                                     |                                                                                                                                                                                            |
|----------------------------|----|----------------|-------------|---------------------------------|------------------------------------------------------|-------------------------------------------------------------------------------------------------------------------------|-----------------------------------------------------|--------------------------------------------------------------------------------------------------------------------------------------------------------------------------------------------|
| <a href="#">EPI1866449</a> | HA | Senegal        | 2020-Dec-23 | <a href="#">EPI ISL 2276068</a> | A/chicken/Senegal/21VIR1084-3/2021                   | Istituto Zooprofilattico Sperimentale delle Venezie, EU/OIE/Reference Laboratory and FAO Reference Centre for AI and ND | Istituto Zooprofilattico Sperimentale Delle Venezie | Lo, F.T.; Diallo, A.A.; Ba, R.O.; Diouf, M.; Diop, A.; Samb, Y.N.; Diouf, M.; Diop, M.; Lo, M.M.; Diouf, M.N.; Zecchin, B.; Tassoni, L.; Fusaro, A.; Pastori, A.; Monne, I.; Terregino, C. |
| <a href="#">EPI1858204</a> | HA | Slovakia       | 2021-Jan-22 | <a href="#">EPI ISL 1665250</a> | A/chicken/Slovakia/Pah10_21VIR1086-5/2021            | Istituto Zooprofilattico Sperimentale delle Venezie, EU/OIE/Reference Laboratory and FAO Reference Centre for AI and ND | Istituto Zooprofilattico Sperimentale Delle Venezie | Dirb?kov?, Z.; Tin?k, M.; Zecchin, B.; Fusaro, A.; Pastori, A.; Schivo, A.; Salviato, A.; Monne, I.; Terregino, C.                                                                         |
| <a href="#">EPI1858196</a> | HA | Romania        | 2021-Feb-23 | <a href="#">EPI ISL 1665249</a> | A/chicken/Romania/10101_21VIR2044-1/2021             | Istituto Zooprofilattico Sperimentale delle Venezie, EU/OIE/Reference Laboratory and FAO Reference Centre for AI and ND | Istituto Zooprofilattico Sperimentale Delle Venezie | Onita, I.; Neicut, A.; Raluca, B.; Razvan, M.; Florica, B.; Zecchin, B.; Fusaro, A.; Pastori, A.; Schivo, A.; Salviato, A.; Monne, I.; Terregino, C.                                       |
| <a href="#">EPI1838673</a> | HA | Netherlands    | 2020-Dec-14 | <a href="#">EPI ISL 711055</a>  | A/chicken/Netherlands/20019879-001005/2020           | Wageningen Bioveterinary Research                                                                                       | Wageningen Bioveterinary Research                   | Beerens, Nancy; Harders, Frank; Pritz-Verschuren, Sylvia; Roose, Marit; Germeraad, Evelien; Engelsma, Marc; Bossers, Alex; Heutink, Rene                                                   |
| <a href="#">EPI1837899</a> | HA | United Kingdom | 2020-Nov-19 | <a href="#">EPI ISL 710512</a>  | A/whistling_duck/England/035643/2020                 | Animal and Plant Health Agency (APHA)                                                                                   | Animal and Plant Health Agency (APHA)               |                                                                                                                                                                                            |
| <a href="#">EPI1866473</a> | HA | Senegal        | 2021-Jan-23 | <a href="#">EPI ISL 2276071</a> | A/great-white_pelican/Senegal/21-67_21VIR1084-8/2021 | Istituto Zooprofilattico Sperimentale delle Venezie, EU/OIE/Reference Laboratory and FAO Reference Centre for AI and ND | Istituto Zooprofilattico Sperimentale Delle Venezie | Lo, F.T.; Diallo, A.A.; Ba, R.O.; Diouf, M.; Diop, A.; Samb, Y.N.; Diouf, M.; Diop, M.; Lo, M.M.; Diouf, M.N.; Zecchin, B.; Tassoni, L.; Fusaro, A.; Pastori, A.; Monne, I.; Terregino, C. |
| <a href="#">EPI1860087</a> | HA | Spain          | 2020-Nov-20 | <a href="#">EPI ISL 2234814</a> | A/peregrine_falcon/Spain/3365-1_21VIR1230-1/2020     | Istituto Zooprofilattico Sperimentale delle Venezie, EU/OIE/Reference Laboratory and FAO Reference Centre for AI and ND | Istituto Zooprofilattico Sperimentale Delle Venezie | Ruano Ramos, M.J.; S?nchez S?nchez, A.; Zecchin, B.; Fusaro, A.; Schivo, A.; Salviato, A.; Giussani, E.; Monne, I.; Terregino, C.                                                          |
| <a href="#">EPI1860071</a> | HA | Spain          | 2021-Jan-27 | <a href="#">EPI ISL 2234812</a> | A/anser_anser/Spain/297-1_21VIR1230-5/2021           | Istituto Zooprofilattico Sperimentale delle Venezie, EU/OIE/Reference Laboratory and FAO                                | Istituto Zooprofilattico Sperimentale Delle Venezie | Ruano Ramos, M.J.; S?nchez S?nchez, A.; Zecchin, B.; Fusaro, A.; Schivo, A.; Salviato, A.; Giussani, E.; Monne, I.; Terregino, C.                                                          |



|                            |    |                |             |                                 |                                                        |                                         |                                                         |                                                                                                                                          |
|----------------------------|----|----------------|-------------|---------------------------------|--------------------------------------------------------|-----------------------------------------|---------------------------------------------------------|------------------------------------------------------------------------------------------------------------------------------------------|
|                            |    |                |             |                                 |                                                        | Reference Centre for AI and ND          |                                                         |                                                                                                                                          |
| <a href="#">EPI1942402</a> | HA | Belgium        | 2020-Nov-13 | <a href="#">EPI ISL 7596571</a> | A/Pica_pica/Belgium/12100_005/2020                     | Sciensano - Animal Infectious Diseases  | Sciensano, Department of Animal Infectious Diseases     | Van Borm, Steven; Vandenbussche, Frank; Roupie, Virginie; Lambrecht, Benedicte; Steensels, Mieke                                         |
| <a href="#">EPI1922851</a> | HA | Denmark        | 2021-Mar-01 | <a href="#">EPI ISL 5449305</a> | A/barnacle_goose/Denmark/17572-1.01/2021-03-01         | Statens Serum Institute                 | Statens Serum Institute                                 | Hjulsager, C                                                                                                                             |
| <a href="#">EPI1862722</a> | HA | Netherlands    | 2021-May-13 | <a href="#">EPI ISL 2227277</a> | A/barnacle_goose/Netherlands/21028534-002/2021         | Wageningen Bioveterinary Research       | Wageningen Bioveterinary Research                       | Beerens, Nancy; Harders, Frank; Pritz-Verschuren, Sylvia; Roose, Marit; Germeraad, Evelien; Engelsma, Marc; Bossers, Alex; Heutink, Rene |
| <a href="#">EPI1859739</a> | HA | Netherlands    | 2021-Feb-22 | <a href="#">EPI ISL 2172528</a> | A/barnacle_goose/Netherlands/21024066-001/2021         | Wageningen Bioveterinary Research       | Wageningen Bioveterinary Research                       | Beerens, Nancy; Harders, Frank; Pritz-Verschuren, Sylvia; Roose, Marit; Germeraad, Evelien; Engelsma, Marc; Bossers, Alex; Heutink, Rene |
| <a href="#">EPI1814675</a> | HA | Belgium        | 2020-Nov-07 | <a href="#">EPI ISL 661313</a>  | A/Anser_albifrons/Belgium/11956_005/2020               | Sciensano - Animal Infectious Diseases  | Sciensano, Department of Animal Infectious Diseases     | Van Borm, Steven; Mathijs, Elisabeth; Vandenbussche, Frank; van den Berg, Thierry; Lambrecht, Bénédicte; Steensels, Mieke                |
| <a href="#">EPI1882551</a> | HA | Kazakhstan     | 2020-Sep-22 | <a href="#">EPI ISL 2932612</a> | A/goose/Kazakhstan/7-20-B-Talg-12/2020                 | National Veterinary Reference Center    | National Center of Biotechnology Republic of Kazakhstan | Asylulan, Amirgazin; Alexandr, Shevtsov; Karibayev, Talgat; Tashkenbayev, Arman; Suraganova, Fariza; Kozhakhmetova, Tamila               |
| <a href="#">EPI1942903</a> | HA | Belgium        | 2020-Dec-03 | <a href="#">EPI ISL 7622619</a> | A/Anser_Brachyrhynchus_Anser_Anser/Belgium/13846/2020  | Sciensano - Animal Infectious Diseases  | Sciensano, Department of Animal Infectious Diseases     | Van Borm, Steven; Vandenbussche, Frank; Roupie, Virginie; Lambrecht, Benedicte; Steensels, Mieke                                         |
| <a href="#">EPI1938836</a> | HA | Sweden         | 2021-Nov-09 | <a href="#">EPI ISL 7053000</a> | A/common_buzzard/Sweden/SVA2111115 Z0376/FB004484/2021 | National Veterinary Institute, SVA      | National Veterinary Institute                           |                                                                                                                                          |
| <a href="#">EPI1846297</a> | HA | United Kingdom | 2020-Dec-31 | <a href="#">EPI ISL 995172</a>  | A/chicken/Northern_Ireland/2020-17671_21VIR113-11/2020 | AFBI - Agri-Food & Bioscience Institute | Istituto Zooprofilattico Sperimentale Delle Venezie     | McMenamy, MJ.; Harkin, V.; Lemon, K.; Zecchin, B.; Fusaro, A.; Schivo, A.; Salviato, A.; Pastori, A.; Monne, I.; Terregino, C.           |
| <a href="#">EPI1882548</a> | HA | Kazakhstan     | 2020-Sep-15 | <a href="#">EPI ISL 2932609</a> | A/duck/Kazakhstan/12-20-B-Talg-11/2020                 | National Veterinary Reference Center    | National Center of Biotechnology Republic of Kazakhstan | Asylulan, Amirgazin; Alexandr, Shevtsov; Karibayev, Talgat; Tashkenbayev, Arman;                                                         |

|                            |    |                    |             |                                 |                                                 |                                                                                                                         |                                                              |                                                                                                                                          |
|----------------------------|----|--------------------|-------------|---------------------------------|-------------------------------------------------|-------------------------------------------------------------------------------------------------------------------------|--------------------------------------------------------------|------------------------------------------------------------------------------------------------------------------------------------------|
|                            |    |                    |             |                                 |                                                 |                                                                                                                         |                                                              | Suraganova, Fariza;<br>Kozhakhmetova, Tamila                                                                                             |
| <a href="#">EPI1847700</a> | HA | Netherlands        | 2021-Jan-09 | <a href="#">EPI_ISL_1048240</a> | A/common_buzzard/Netherlands/210213-96-002/2021 | Wageningen Bioveterinary Research                                                                                       | Wageningen Bioveterinary Research                            | Beerens, Nancy; Harders, Frank; Pritz-Verschuren, Sylvia; Roose, Marit; Germeraad, Evelien; Engelsma, Marc; Bossers, Alex; Heutink, Rene |
| <a href="#">EPI1815142</a> | HA | Italy              | 2020-Nov-21 | <a href="#">EPI_ISL_683592</a>  | A/Eurasian_wigeon/Italy/20VIR7301-206/2020      | Istituto Zooprofilattico Sperimentale delle Venezie, EU/OIE/Reference Laboratory and FAO Reference Centre for AI and ND | Istituto Zooprofilattico Sperimentale Delle Venezie          | Zecchin, B.; Fusaro, A.; Pastori, A.; Milani, A.; Salviato, A.; Schivo, A.; Monne, I.; Terregino, C.                                     |
| <a href="#">EPI1859811</a> | HA | Netherlands        | 2021-Mar-22 | <a href="#">EPI_ISL_2174728</a> | A/barnacle_goose/Netherlands/21025769-002/2021  | Wageningen Bioveterinary Research                                                                                       | Wageningen Bioveterinary Research                            | Beerens, Nancy; Harders, Frank; Pritz-Verschuren, Sylvia; Roose, Marit; Germeraad, Evelien; Engelsma, Marc; Bossers, Alex; Heutink, Rene |
| <a href="#">EPI1882563</a> | HA | Kazakhstan         | 2020-Oct-09 | <a href="#">EPI_ISL_2932683</a> | A/chicken/Kazakhstan/1-20-B-Talg-67/2020        | National Veterinary Reference Center                                                                                    | National Center of Biotechnology Republic of Kazakhstan      | Asylulan, Amirgazin; Alexandr, Shevtsov; Karibayev, Talgat; Tashkenbayev, Arman; Suraganova, Fariza; Kozhakhmetova, Tamila               |
| <a href="#">EPI1814337</a> | HA | Russian Federation | 2020-Sep-08 | <a href="#">EPI_ISL_654833</a>  | A/chicken/Chelyabinsk/201/2020                  | State Research Center of Virology and Biotechnology (VECTOR)                                                            | State Research Center of Virology and Biotechnology (VECTOR) | Natalia, Goncharova; Ivan, Susloparov; Natalia, Kolosova; Alexey, Danilenko; Juliya, Bulanovich; Vasilii, Marchenko; Alexander, Ryzhikov |
