# Supplementary figures and images for: Emergence of a Reassortant 2.3.4.4b Highly Pathogenic H5N1 Avian Influenza Virus Containing H9N2 PA Gene in Burkina Faso, West Africa, in 2021
Source: MDPI journal article supplement (doi:10.3390/v14091901), 2022-08-27

Maximum Likelihood  
phylogenetic tree of  
the M gene, inferred  
using IQTree v1.6.6

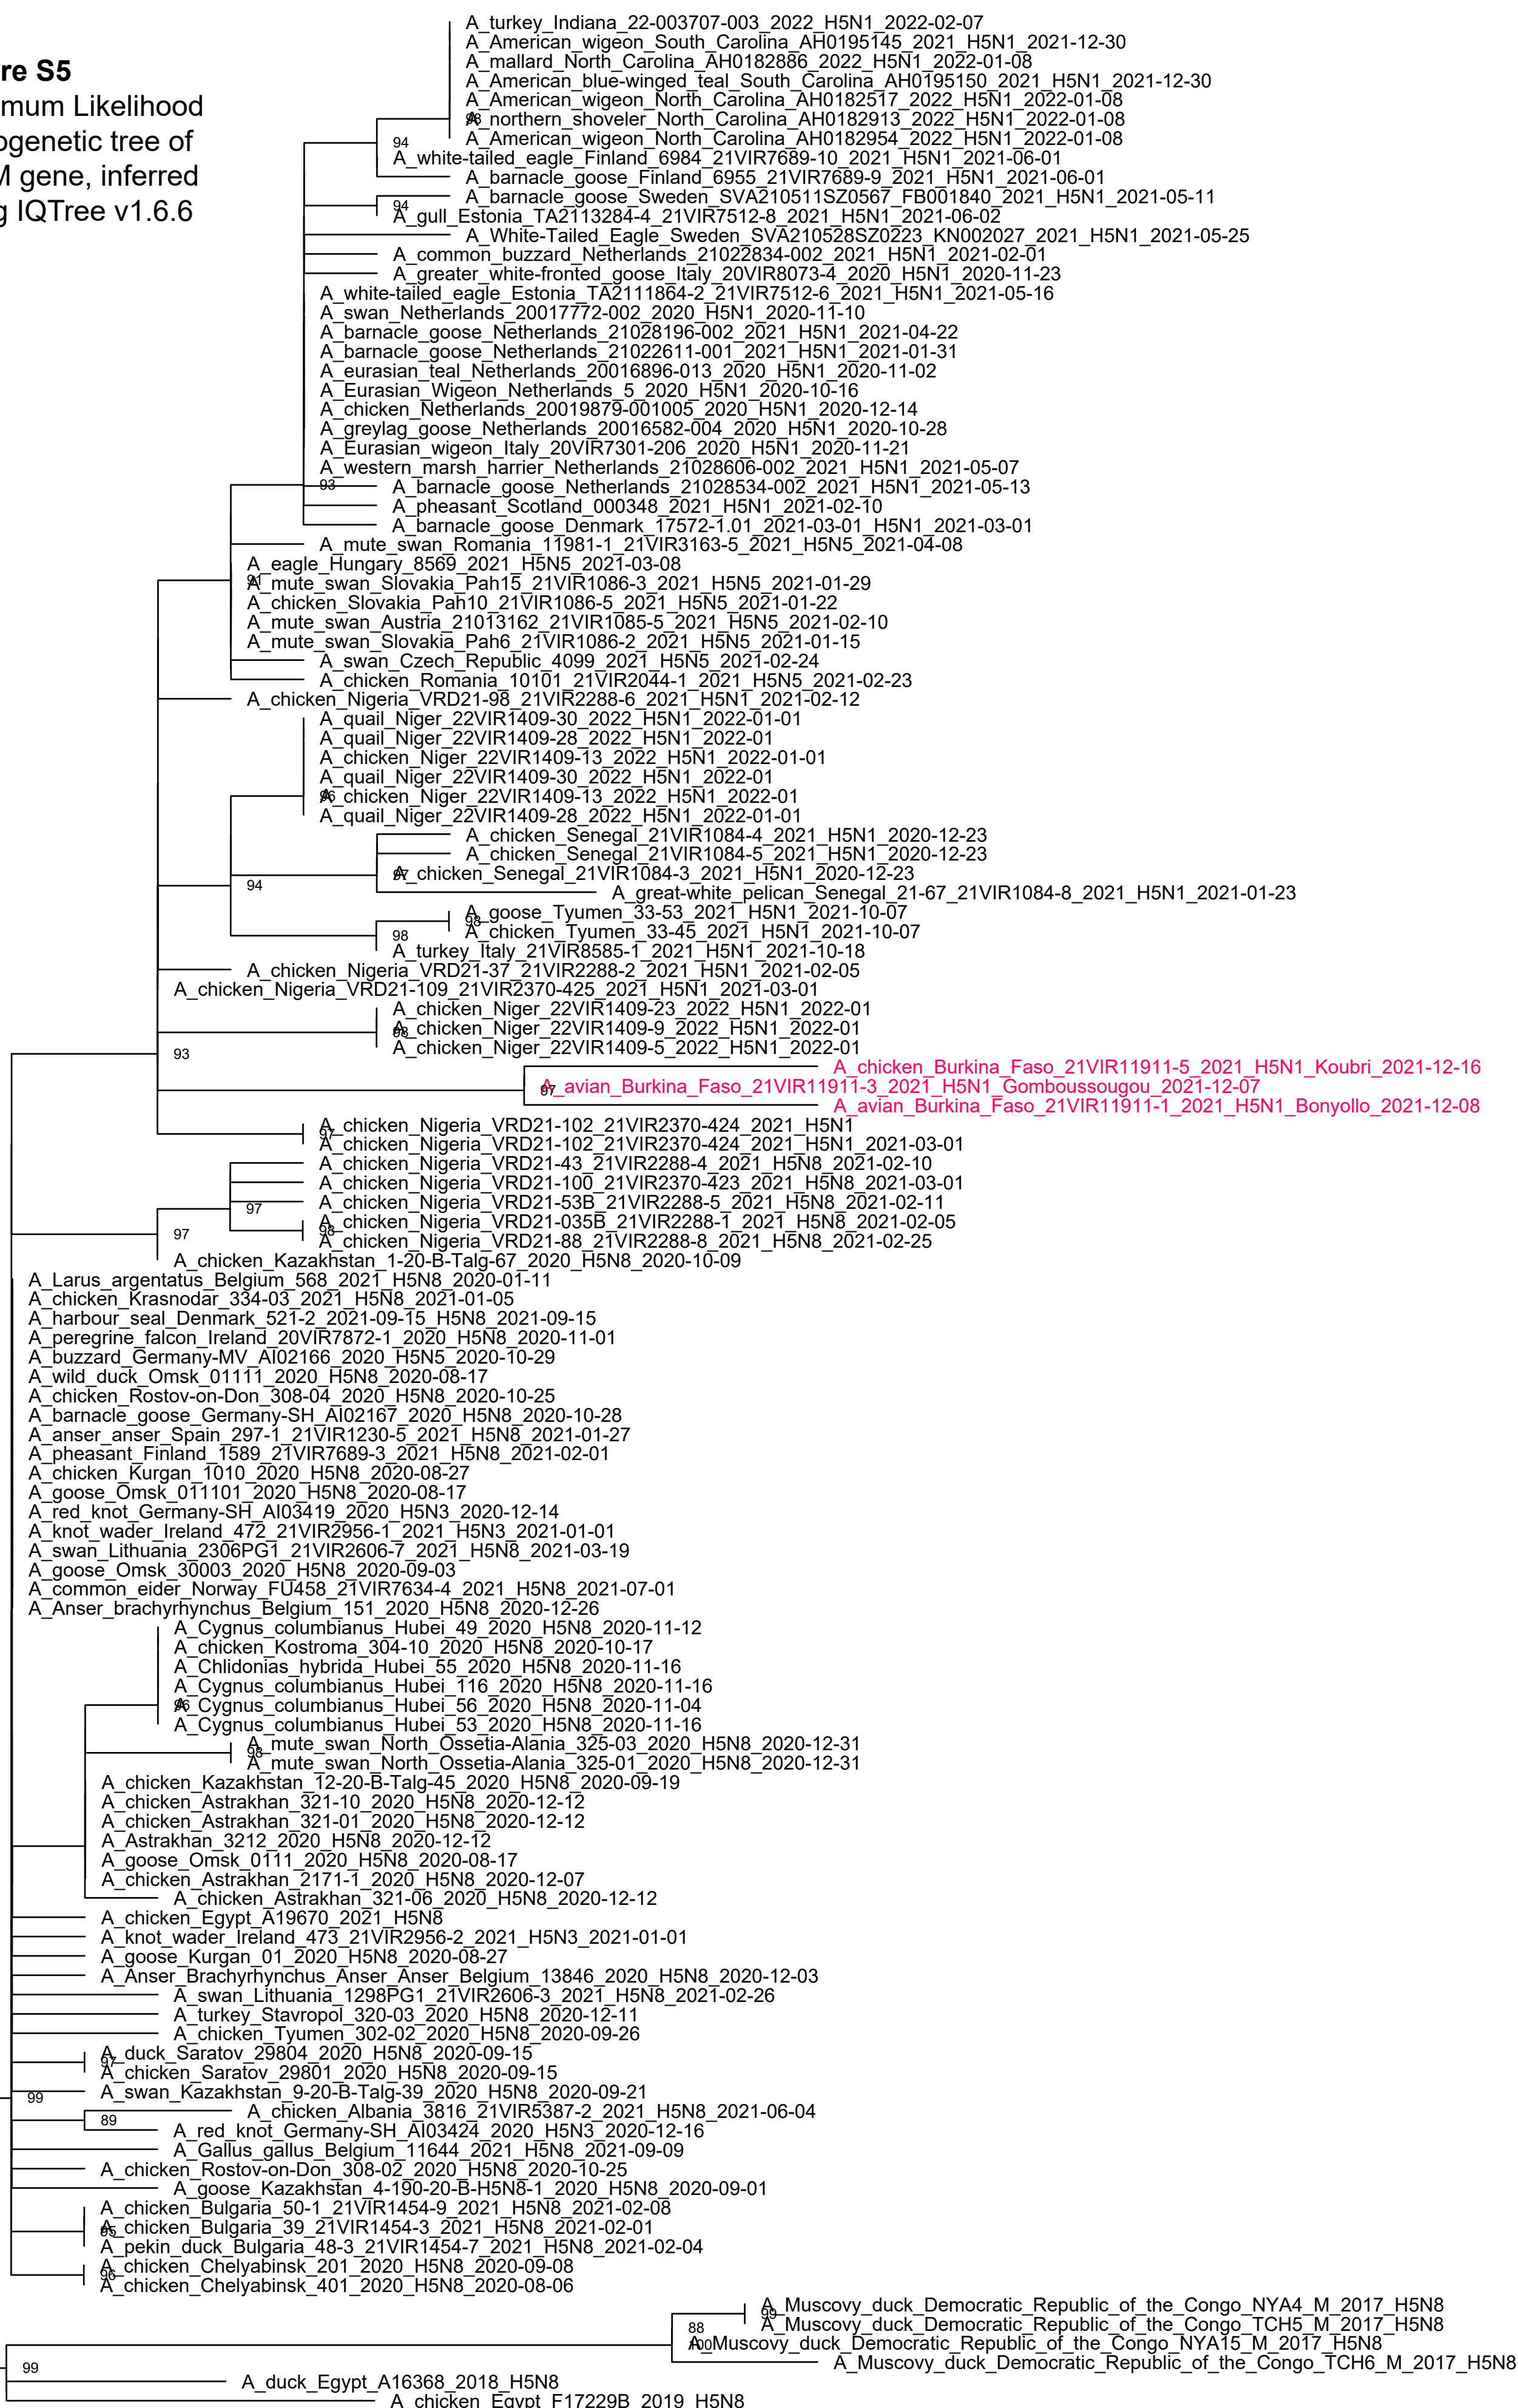

Supplement: s1 [file s1]

**Figure S4**  
Maximum Likelihood phylogenetic tree  
of the NA gene, inferred using  
IQTree v1.6.6

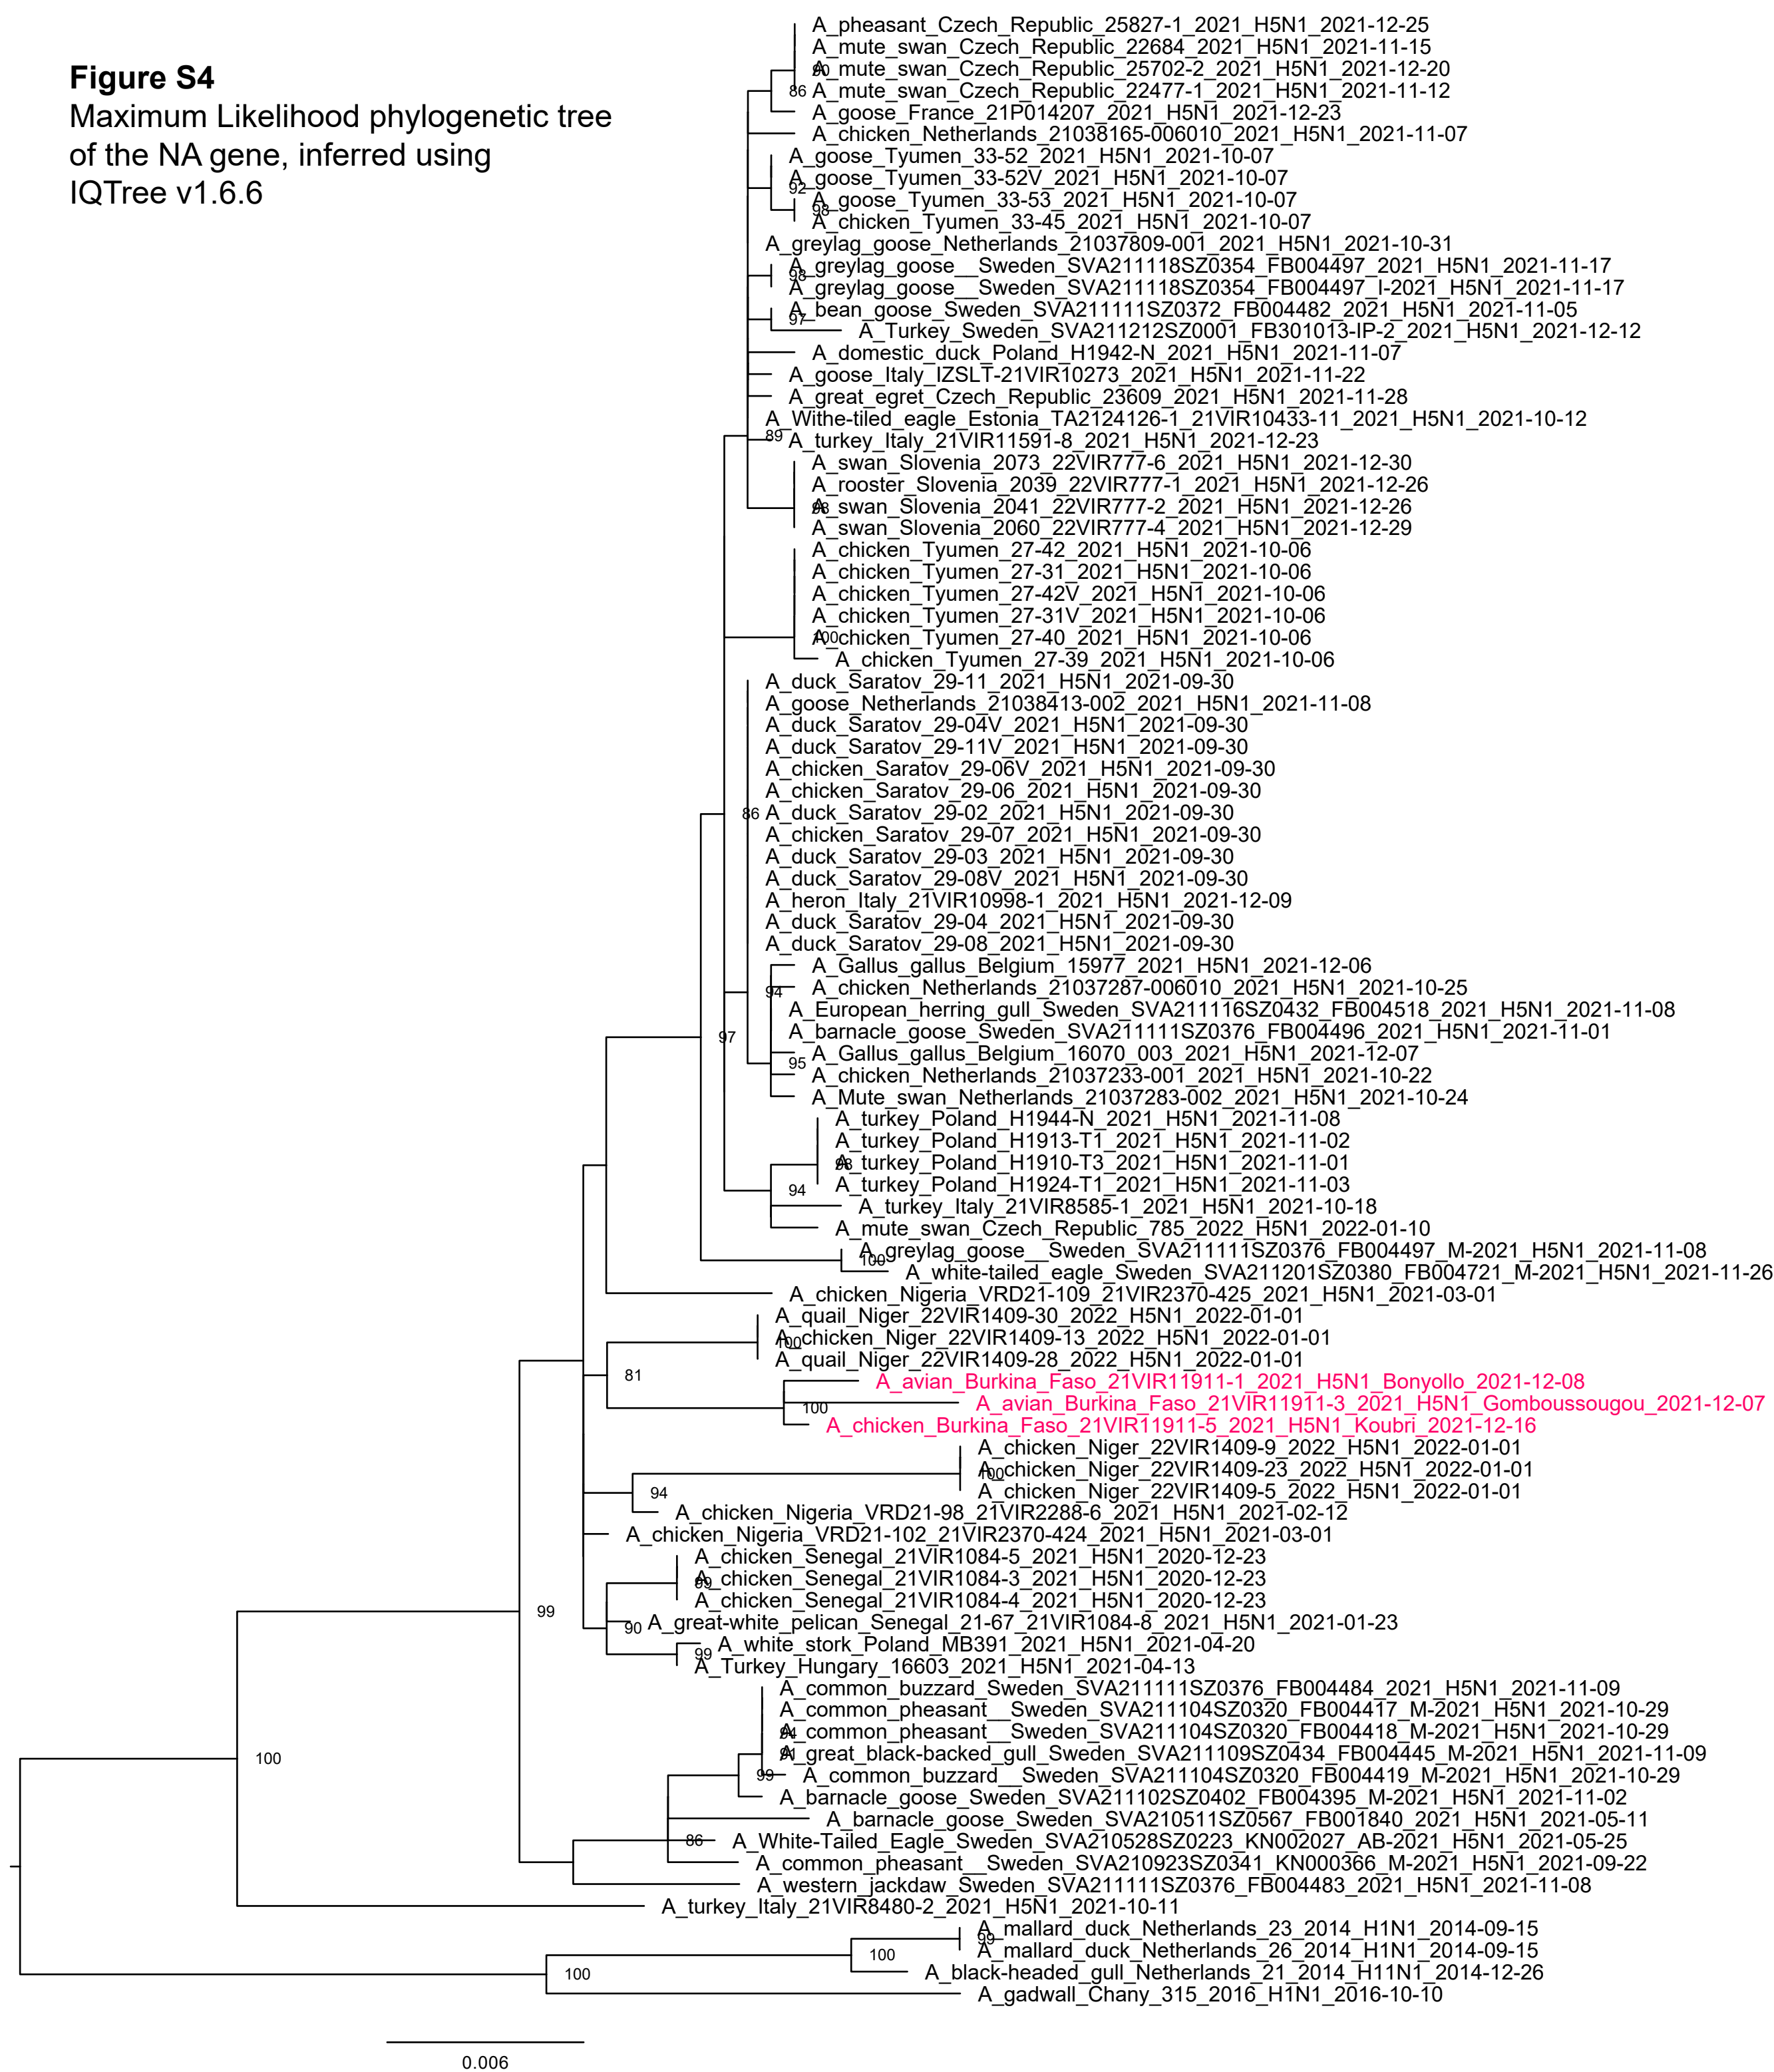

Supplement: s1 [file s1]

**Figure S7**  
Bayesian Maximum Clade  
Credibility tree of the HA gene,  
inferred using BEAST v1.10.4

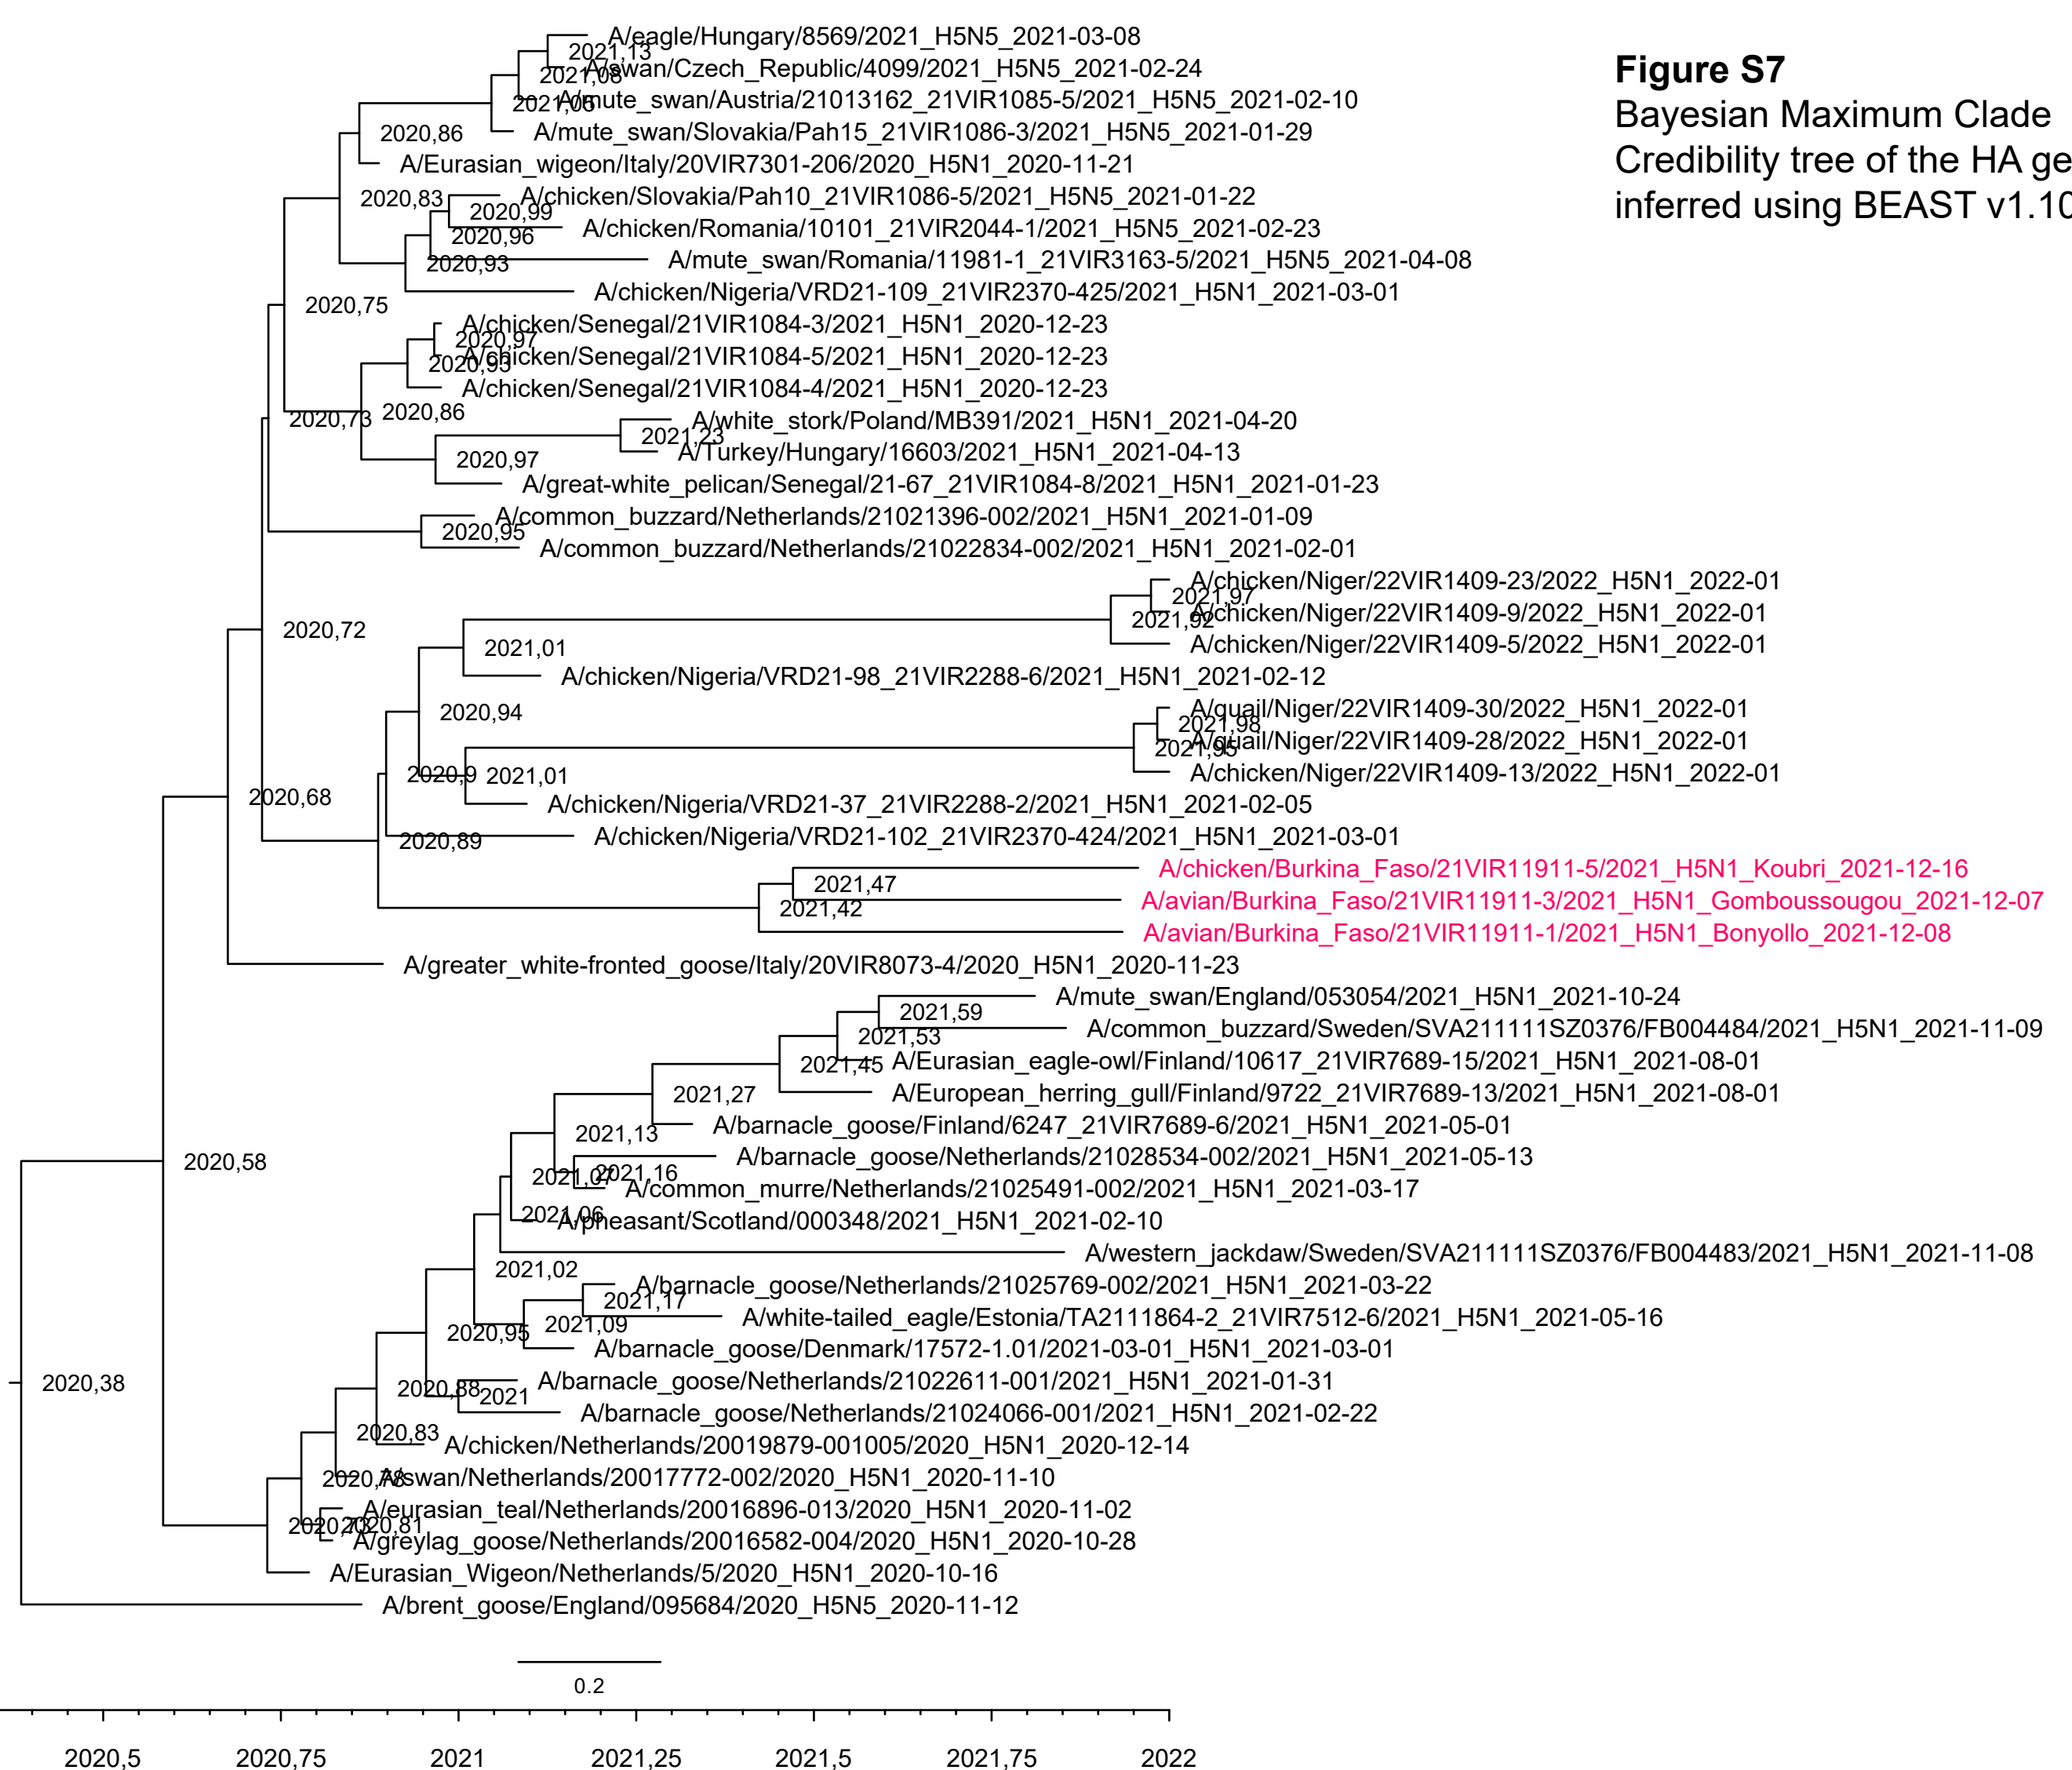

Supplement: s1 [file s1]

**Figure S3**  
Maximum Likelihood phylogenetic tree  
of the NP gene, inferred using  
IQTree v1.6.6

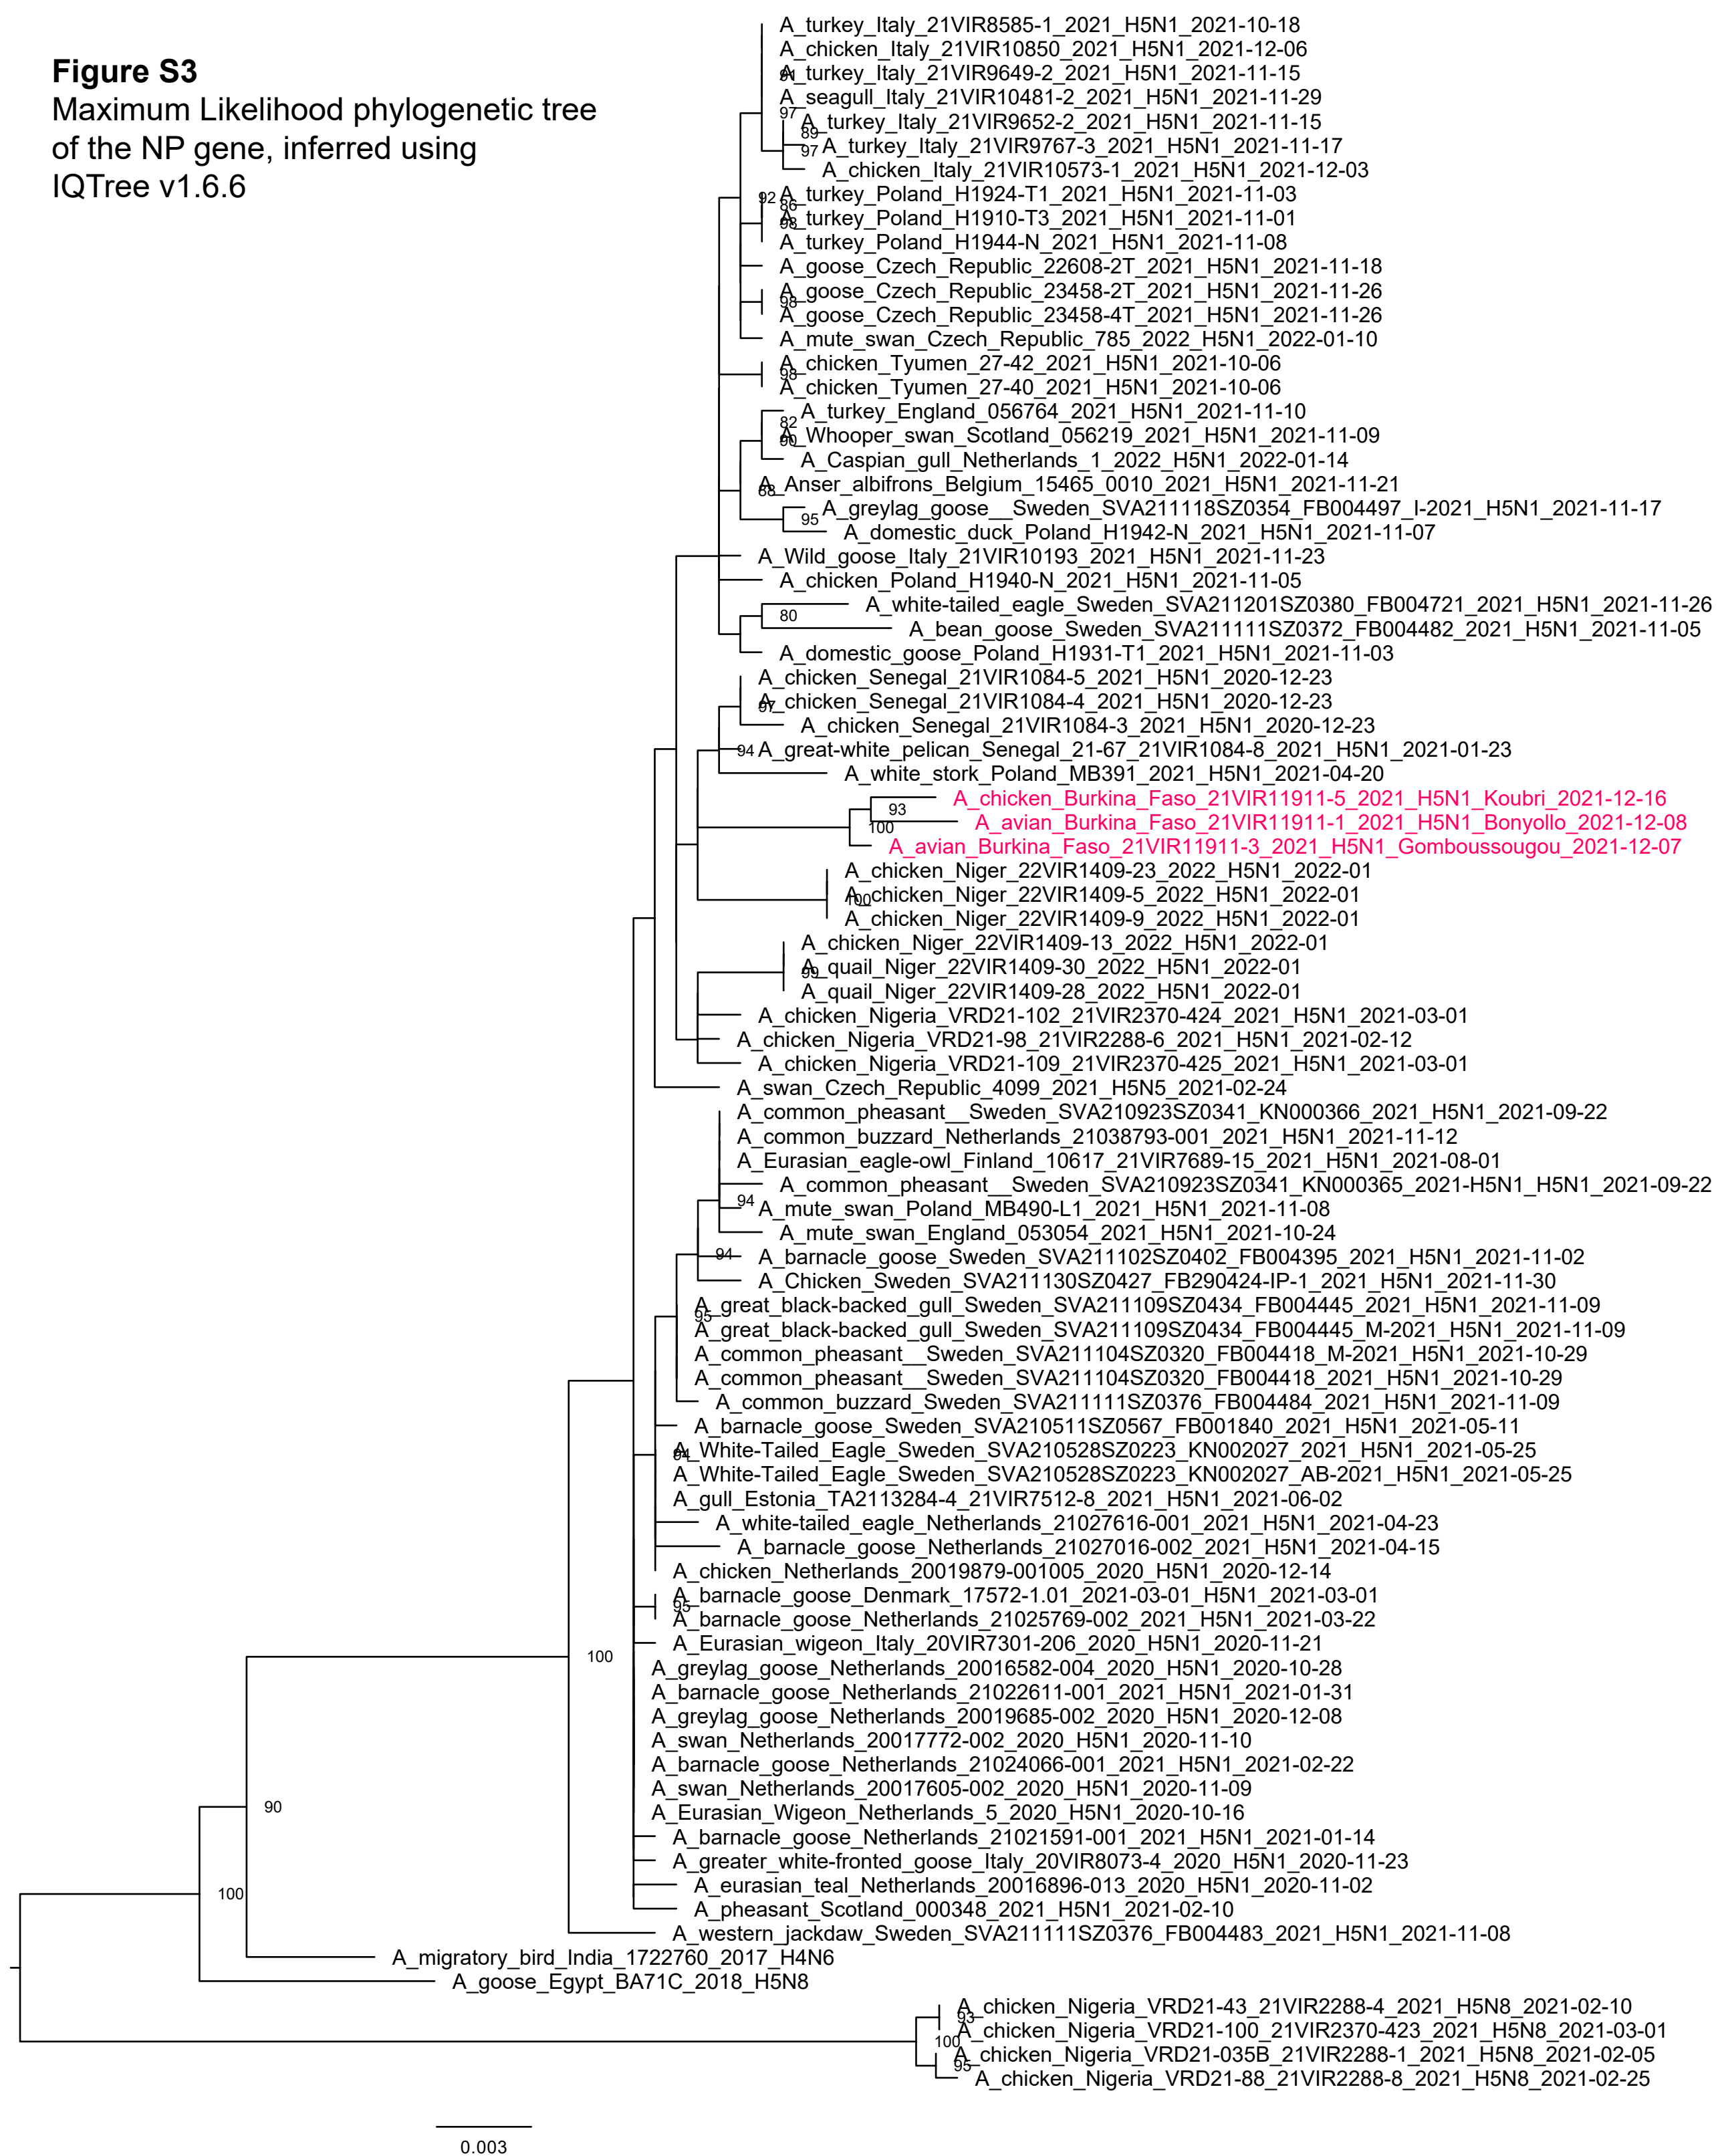

Supplement: s1 [file s1]

**Figure S1**  
Maximum Likelihood phylogenetic tree  
of the PB2 gene, inferred using  
IQTree v1.6.6

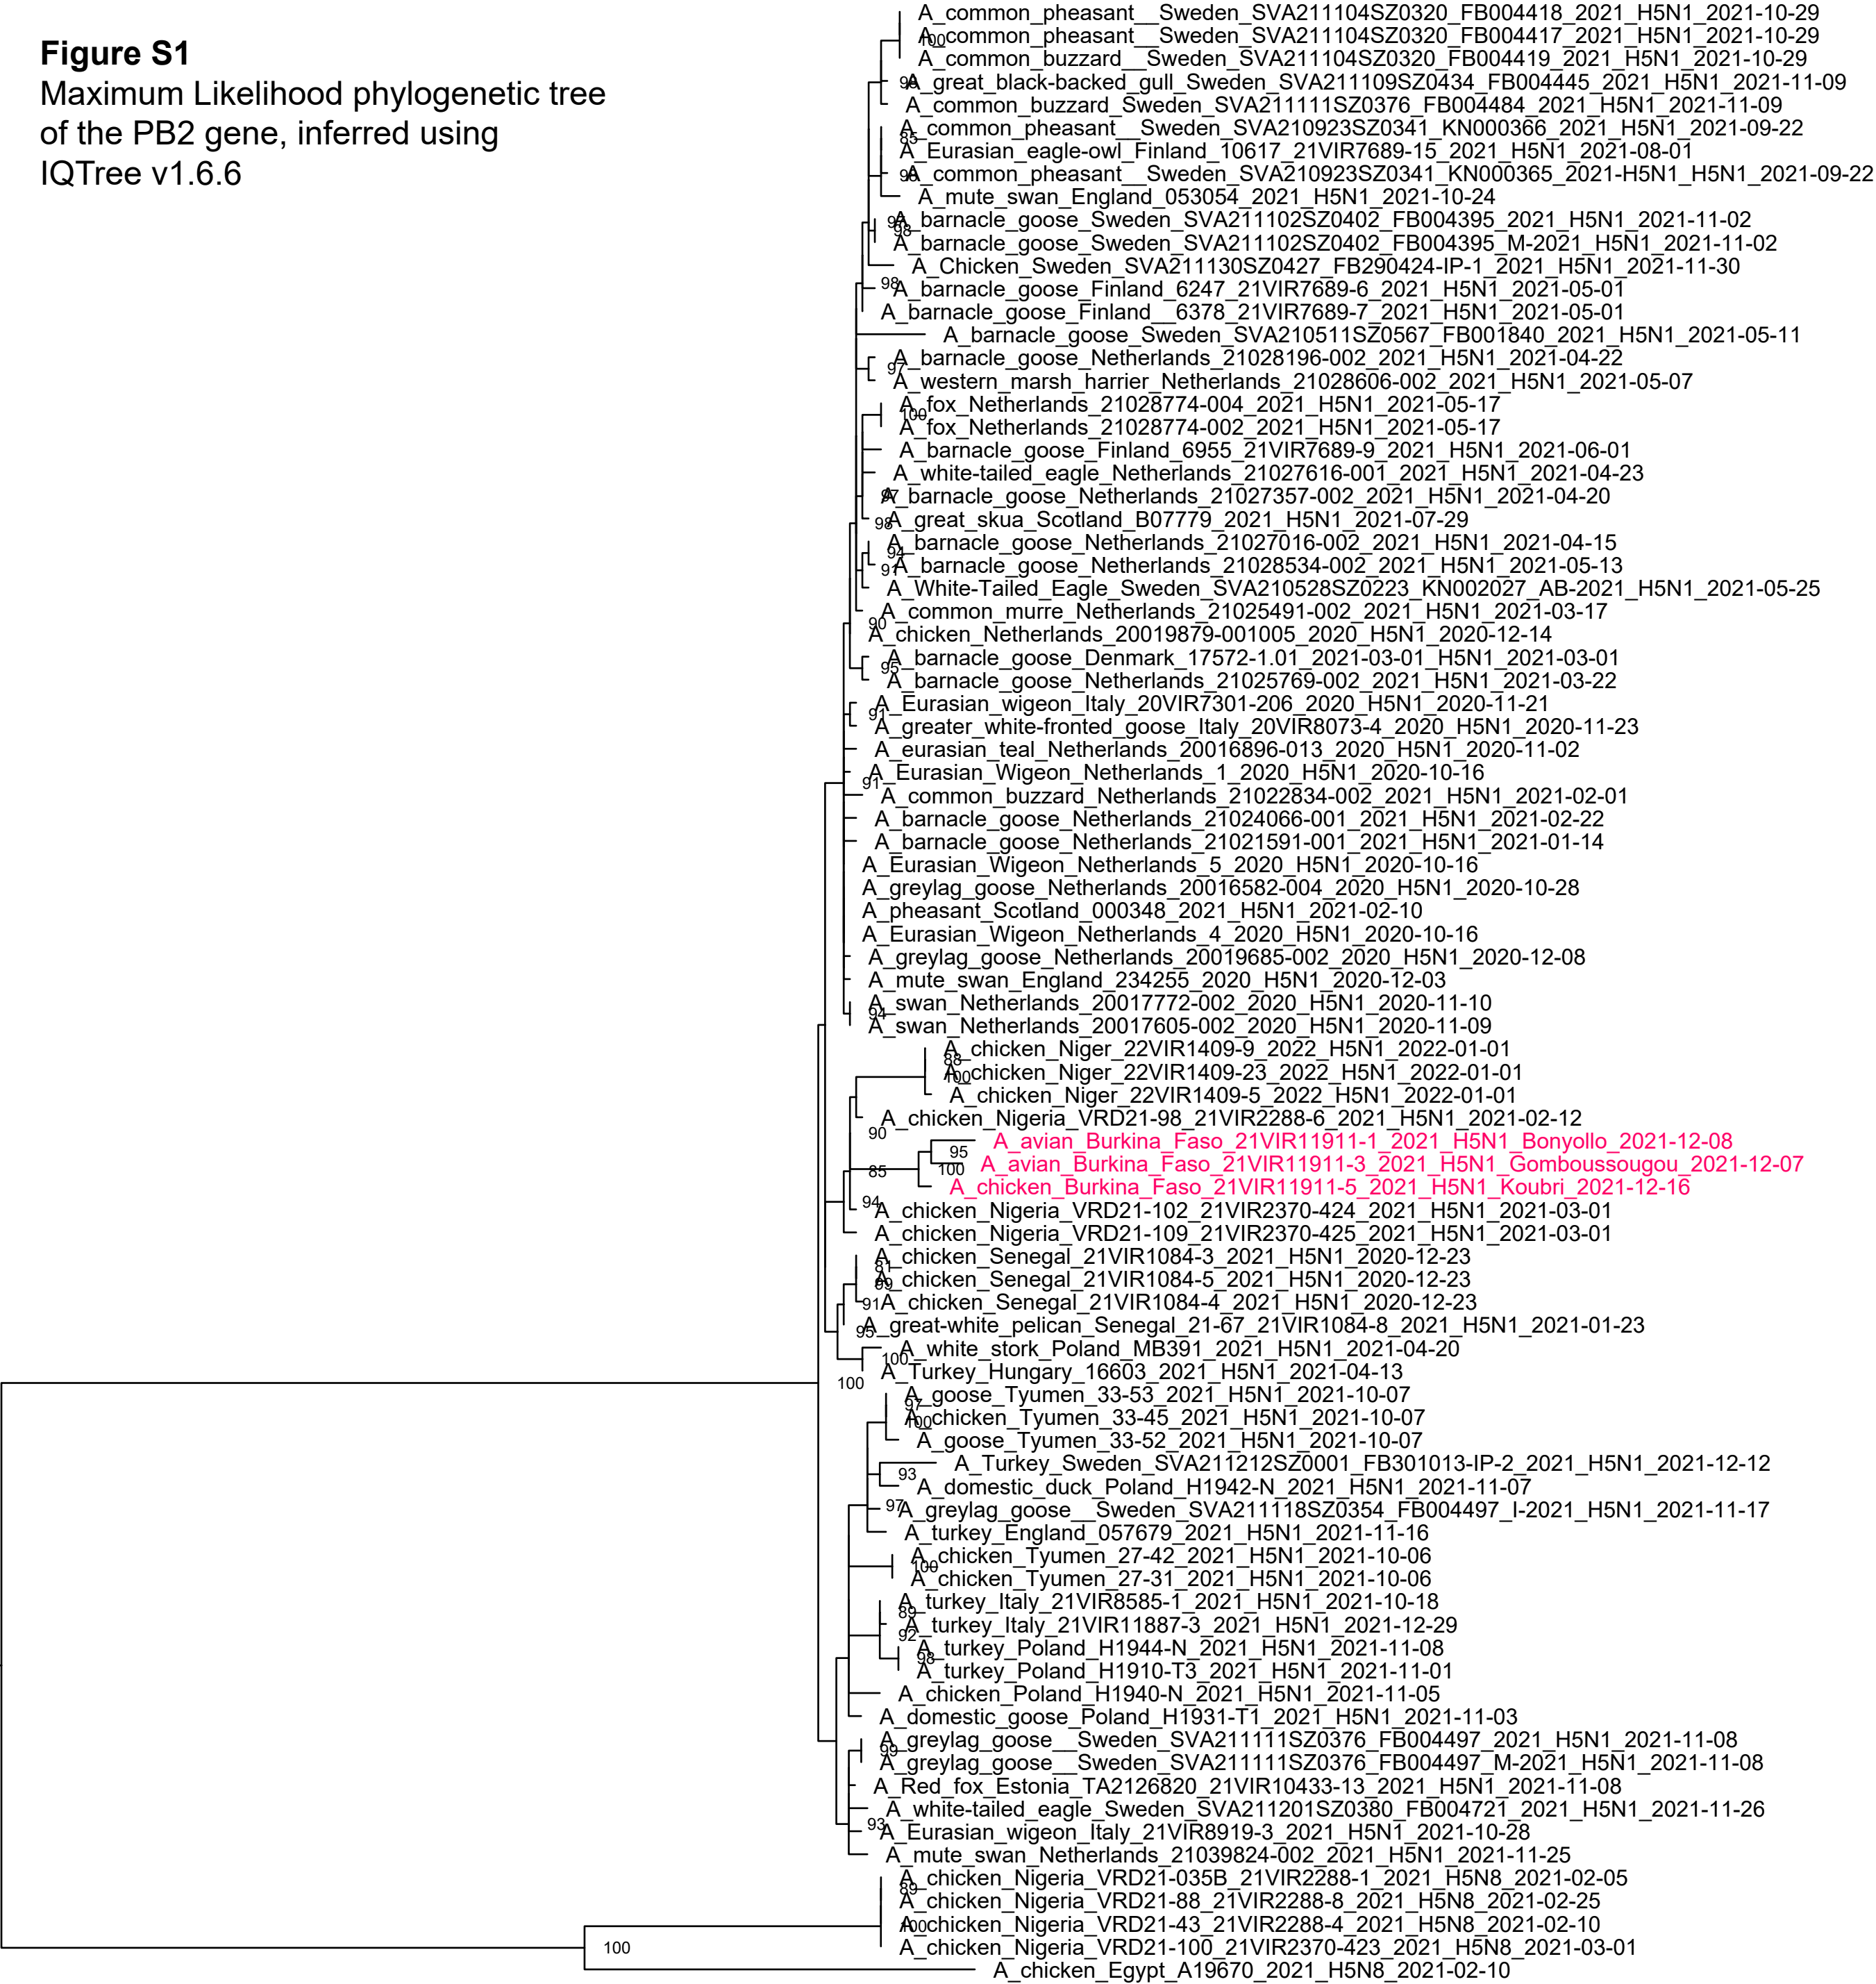

0.007

Supplement: s1 [file s1]

**Figure S6**  
Maximum Likelihood phylogenetic tree  
of the NS gene, inferred using  
IQTree v1.6.6

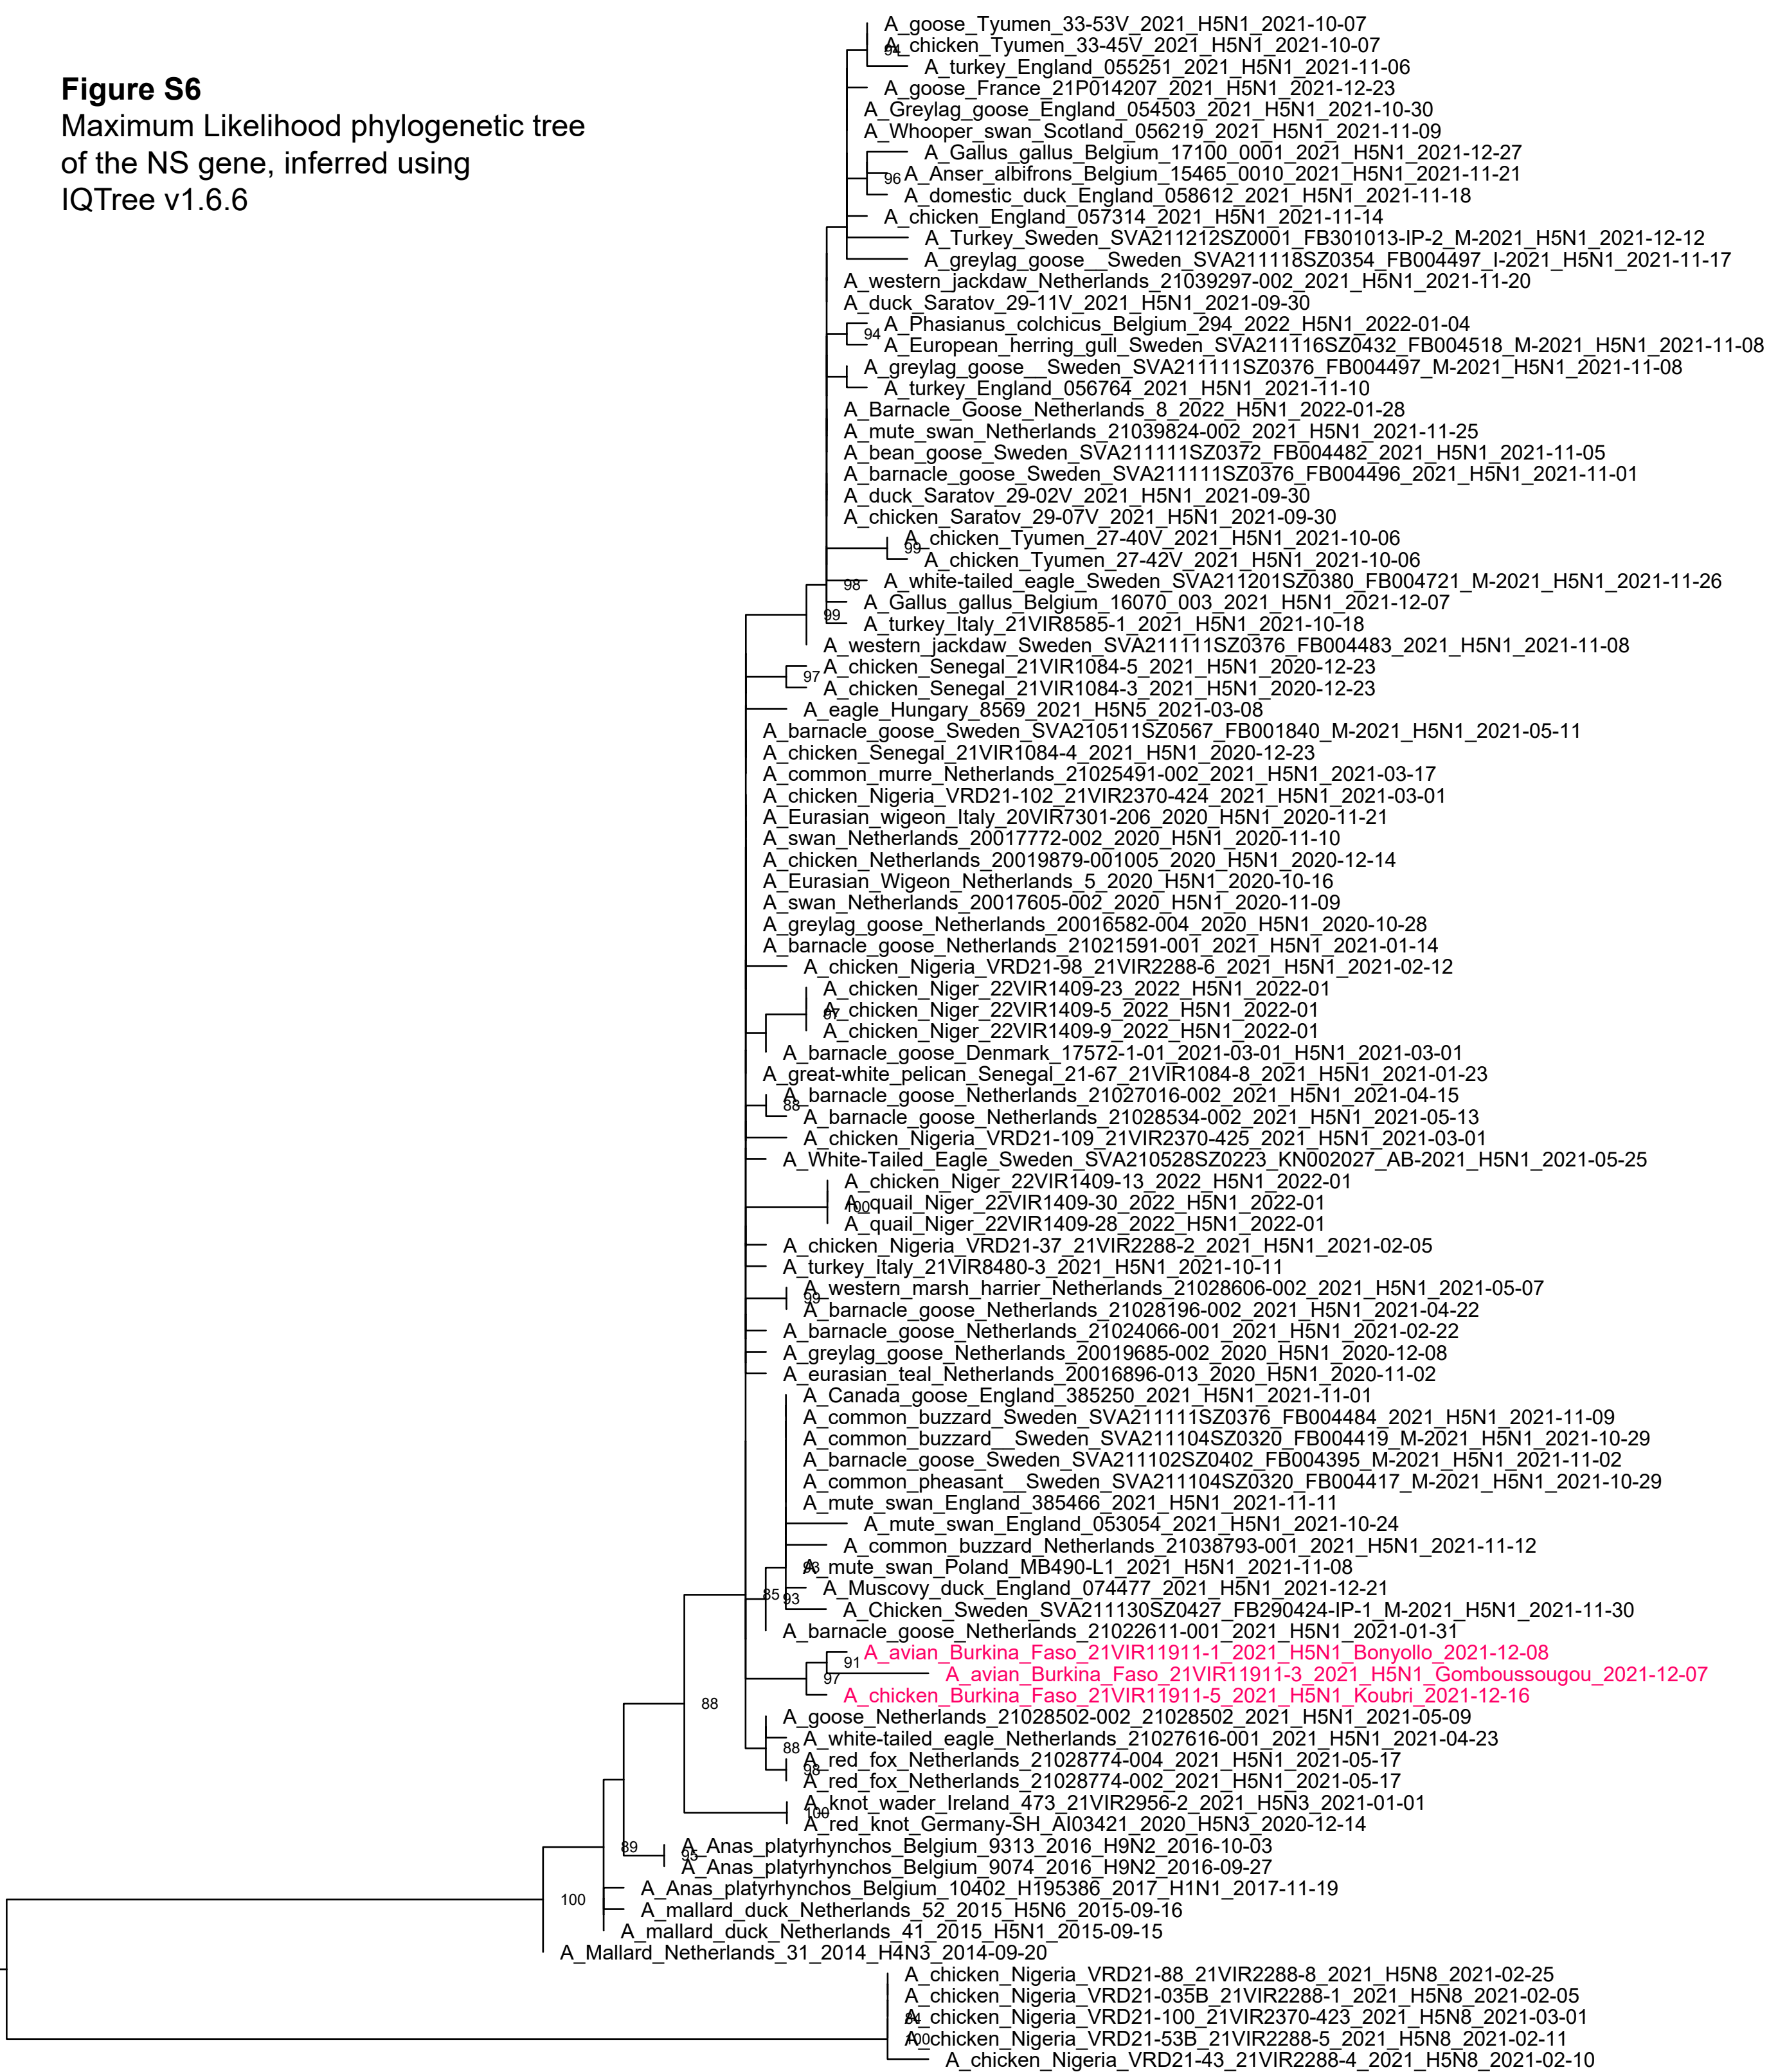

0.01

Supplement: s1 [file s1]

**Figure S2**  
Maximum Likelihood phylogenetic tree  
of the PB1 gene, inferred using  
IQTree v1.6.6

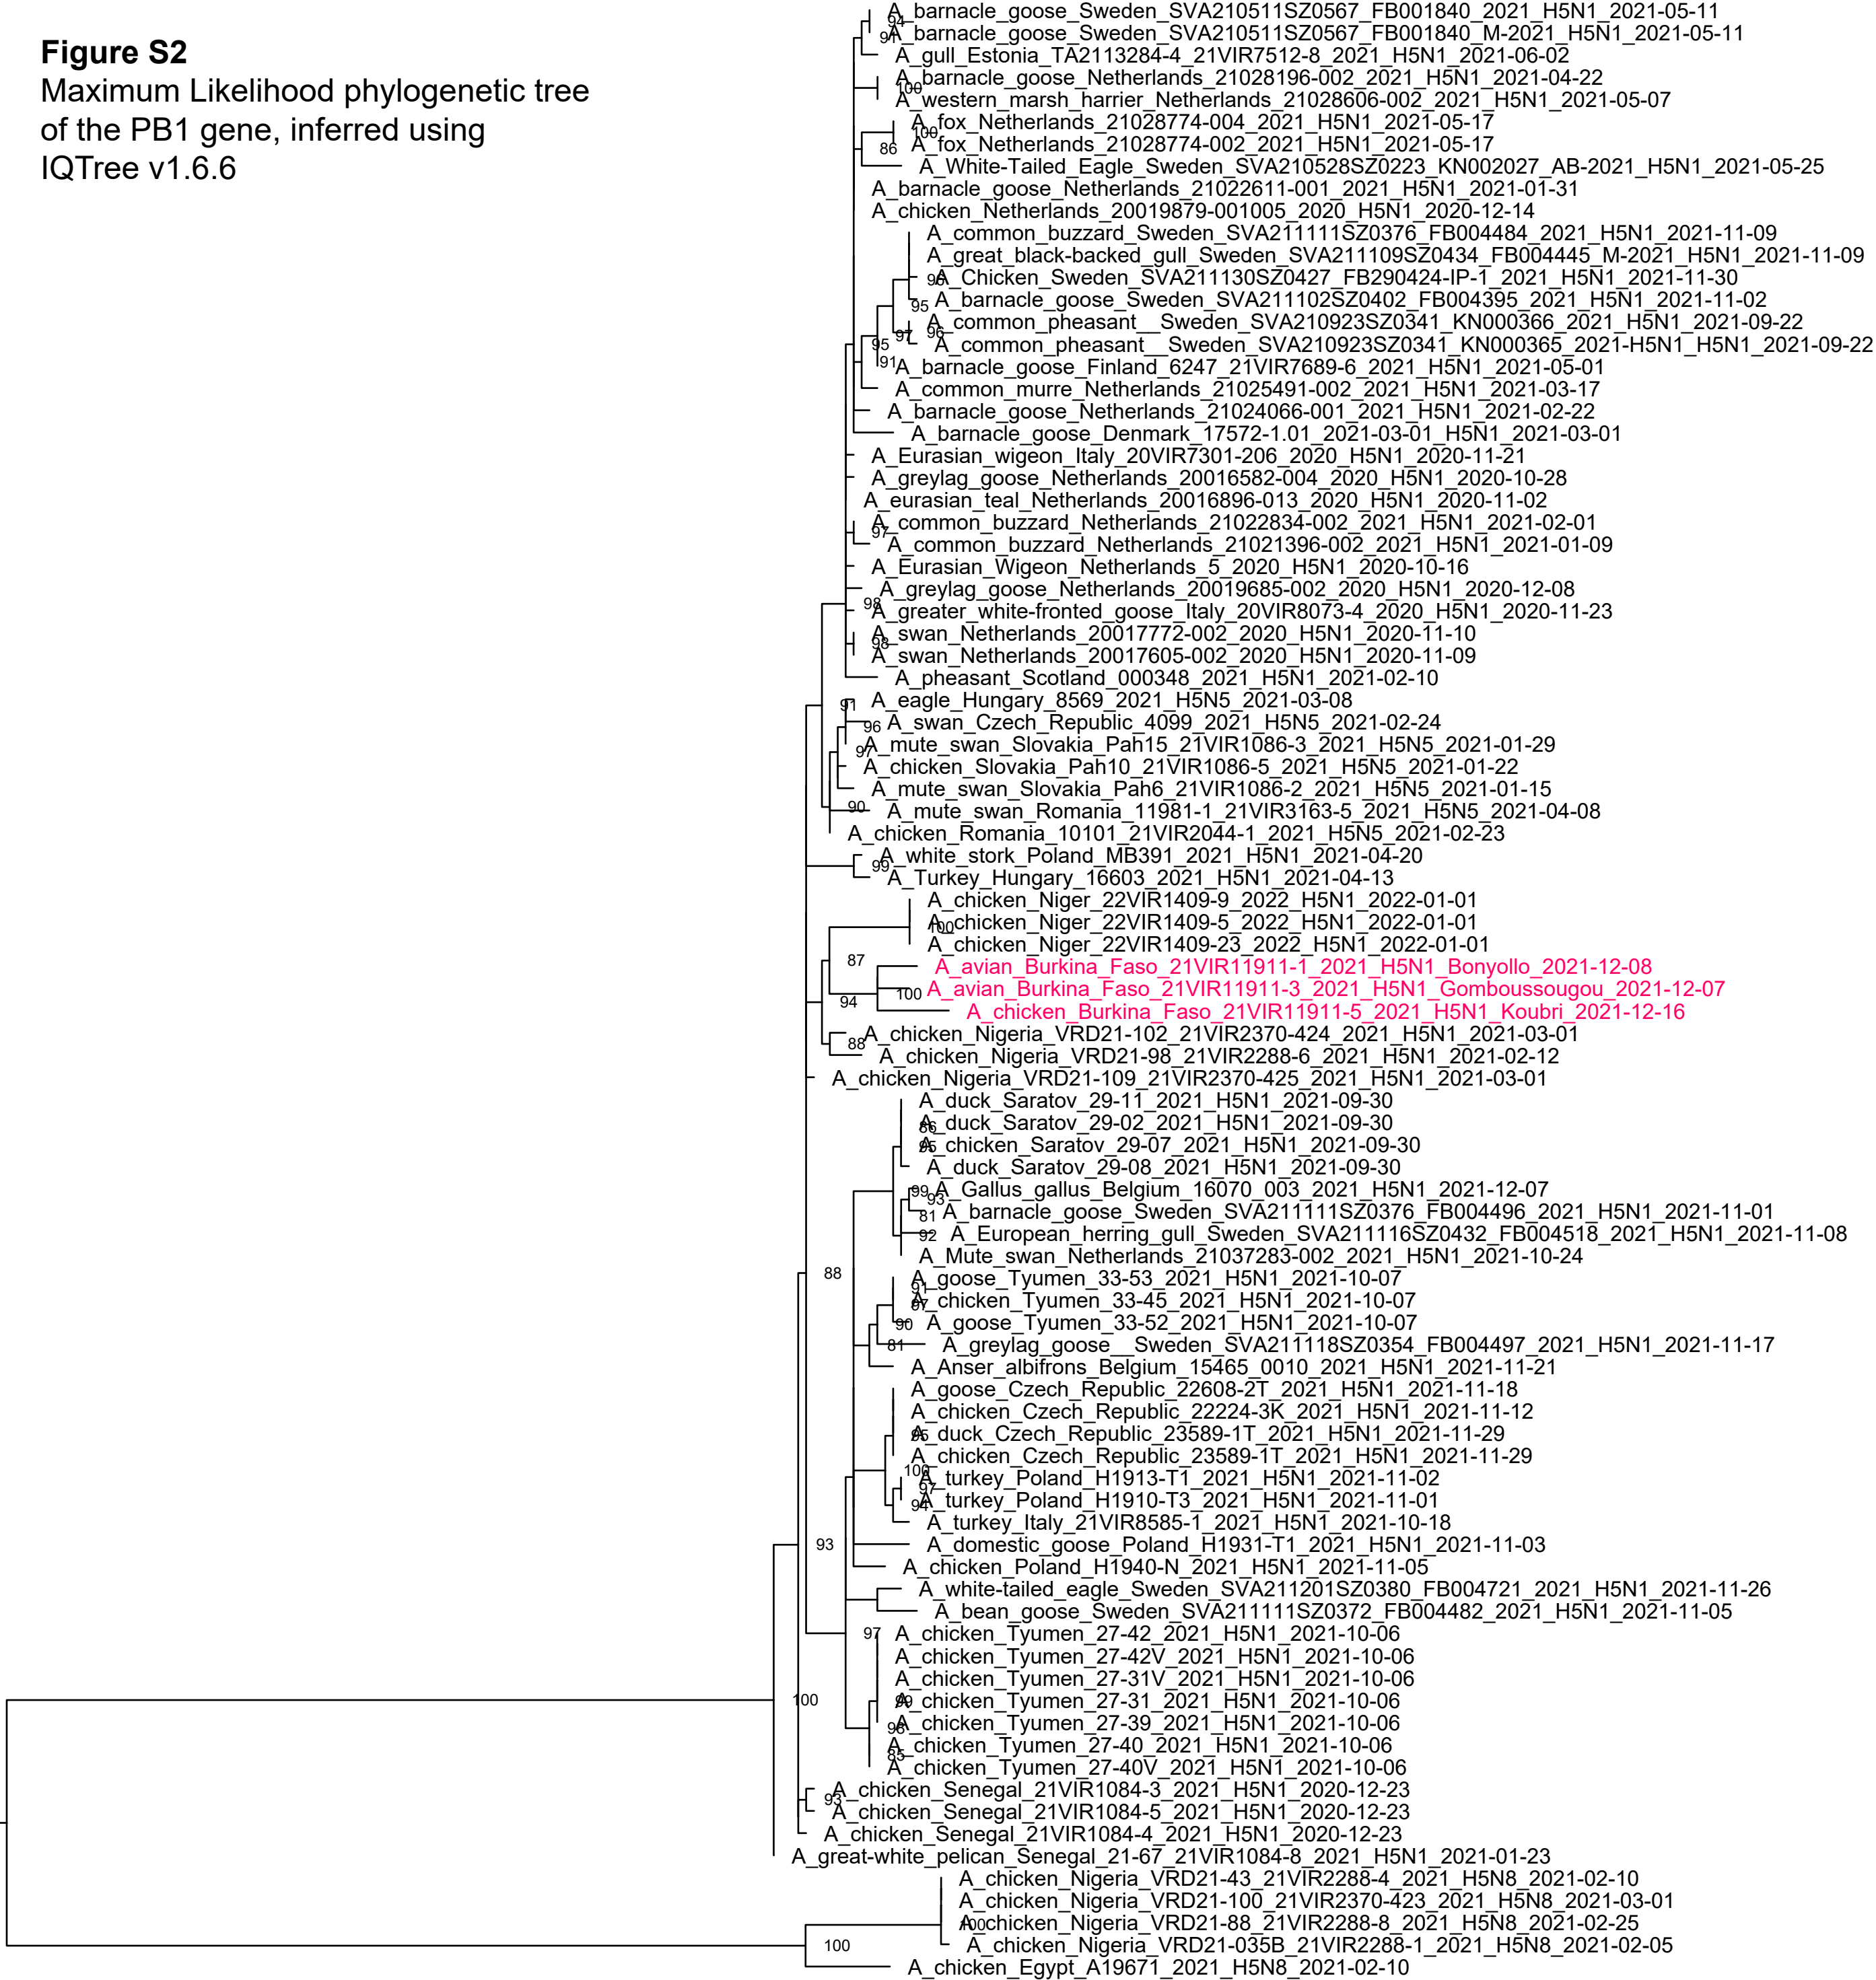

Supplement: s1 [file s1]
